# Supplementary material for: Investigating the effects of genetic risk of schizophrenia on behavioural traits
Source: PubMed Central journal article supplement (PMC7822841; doi:10.1038/s41537-020-00131-2), 2021-01-22
Supplement: 41537_2020_131_MOESM1_ESM.pdf [file 41537_2020_131_MOESM1_ESM.pdf]

# Supplementary Material

**Supplementary Table 1.** All 529 behavioural traits used in the analysis, as described by the UK Biobank for completeness.

Ever thought that life not worth living

Self harmed

Self harmed in past year

Number of times self harmed

Attempted suicide

Attempted suicide in past year

Ever contemplated self harm

Contemplated self harm in past year

Felt hated by family member as a child

Physically abused by family as a child

Sexually molested as a child

Belittlement by partner or ex partner as an adult

Physical violence by partner or ex partner as an adult

Sexual interference by partner or ex partner without consent as an adult

Carer support indicators

Detention categories

Legal statuses

Mental categories

History of psychiatric care on admission

Number of correct matches in round 0 1

Number of correct matches in round 0 2

Number of correct matches in round 0 3

Number of incorrect matches in round 0 1

Number of incorrect matches in round 0 2

Number of incorrect matches in round 0 3

Time to complete round 0 1

Time to complete round 0 2

Time to complete round 0 3

Own or rent accommodation lived in

Length of time at current address

Number in household

Number of vehicles in household

Average total household income before tax

Time employed in main current job

Length of working week for main job

Frequency of travelling from home to job workplace

Distance between home and job workplace

Job involves mainly walking or standing

Job involves heavy manual or physical work

Job involves shift work

Age completed full time education

Number of days week walked 10 minutes

Duration of walks

Number of days week of moderate physical activity 10 minutes

Duration of moderate activity

Number of days week of vigorous physical activity 10 minutes

Duration of vigorous activity

Usual walking pace

Frequency of stair climbing in last 4 weeks

Frequency of walking for pleasure in last 4 weeks

Duration walking for pleasure

Frequency of strenuous sports in last 4 weeks

Duration of strenuous sports

Frequency of light DIY in last 4 weeks

Duration of light DIY

Frequency of friend family visits

Time spend outdoors in summer

Time spent outdoors in winter

Time spent watching television TV

Time spent using computer

Time spent driving

Drive faster than motorway speed limit

Length of mobile phone use

Weekly usage of mobile phone in last 3 months

Hands free device speakerphone use with mobile phone in last 3 month

Difference in mobile phone use compared to two years previously

Usual side of head for mobile phone use

Sleep duration

Getting up in morning

Morning evening person chronotype

Nap during day

Sleeplessness insomnia

Snoring

Daytime dozing sleeping narcolepsy

Current tobacco smoking

Past tobacco smoking

Smoking smokers in household

Exposure to tobacco smoke at home

Exposure to tobacco smoke outside home

Cooked vegetable intake

Salad raw vegetable intake

Fresh fruit intake

Dried fruit intake

Oily fish intake

Non oily fish intake

Processed meat intake

Poultry intake

Beef intake

Lamb mutton intake

Pork intake

Cheese intake

Milk type used

Salt added to food

Tea intake

Coffee intake

Water intake

Major dietary changes in the last 5 years

Variation in diet

Alcohol intake frequency

Average weekly red wine intake

Average weekly beer plus cider intake

Average weekly spirits intake

Average weekly fortified wine intake

Alcohol intake versus 10 years previously

Country of birth UK elsewhere

Breastfed as a baby

Skin colour

Adopted as a child

Maternal smoking around birth

Father still alive

Mother still alive

Mood swings

Miserableness

Irritability

Sensitivity hurt feelings

Fed up feelings

Nervous feelings

Worrier anxious feelings

Tense 'highly strung'

Worry too long after embarrassment  
Suffer from 'nerves'  
Loneliness isolation  
Guilty feelings  
Risk taking  
Frequency of depressed mood in last 2 weeks  
Frequency of unenthusiasm disinterest in last 2 weeks  
Frequency of tenseness restlessness in last 2 weeks  
Frequency of tiredness lethargy in last 2 weeks  
Seen doctor GP for nerves anxiety tension or depression  
Seen a psychiatrist for nerves anxiety tension or depression  
Able to confide  
Answered sexual history questions  
Age first had sexual intercourse  
Lifetime number of sexual partners  
Ever had same sex intercourse  
Overall health rating  
Plays computer games  
Use of sun uv protection  
Frequency of solarium sunlamp use  
Falls in the last year  
Number of children fathered  
Frequency of heavy DIY in last 4 weeks  
Duration of heavy DIY  
Light smokers at least 100 smokes in lifetime  
Reason for reducing amount of alcohol drunk  
Number of live births  
Ever had stillbirth spontaneous miscarriage or termination  
Ever taken oral contraceptive pill  
Age started oral contraceptive pill  
Ever used hormone replacement therapy HRT  
Age started smoking in former smokers  
Type of tobacco previously smoked  
Number of cigarettes previously smoked daily  
Age stopped smoking  
Ever stopped smoking for 6 months  
Number of unsuccessful stop smoking attempts  
Likelihood of resuming smoking  
Caffeine drink within last hour  
Pregnant  
Smoked cigarette or pipe within last hour  
Job involve night shift work  
Age started smoking in current smokers  
Type of tobacco currently smoked  
Number of cigarettes currently smoked daily current cigarette smokers  
Time from waking to first cigarette  
Difficulty not smoking for 1 day  
Ever tried to stop smoking  
Wants to stop smoking  
Smoking compared to 10 years previous  
Frequency of other exercises in last 4 weeks  
Duration of other exercises  
Year immigrated to UK United Kingdom  
Lifetime number of same sex sexual partners  
Age when last ate meat  
Former alcohol drinker  
Number of pregnancy terminations  
Reason former drinker stopped drinking alcohol  
Completion status of numeric memory test  
Maximum digits remembered correctly  
Number of rounds of numeric memory test performed  
Average monthly red wine intake  
Average monthly champagne plus white wine intake

Average monthly beer plus cider intake

Average monthly spirits intake

Average monthly fortified wine intake

Average monthly intake of other alcoholic drinks

Happiness

Work job satisfaction

Health satisfaction

Family relationship satisfaction

Friendships satisfaction

Financial situation satisfaction

Ever depressed for a whole week

Longest period of depression

Number of depression episodes

Ever unenthusiastic disinterested for a whole week

Ever manic hyper for 2 days

Ever highly irritable argumentative for 2 days

Private healthcare

Noisy workplace

Loud music exposure frequency

Attempted fluid intelligence FI test

F11 numeric addition test

F12 identify largest number

F13 word interpolation

F14 positional arithmetic

F15 family relationship calculation

F16 conditional arithmetic

F17 synonym

F18 chained arithmetic

Average weekly intake of other alcoholic drinks

Longest period of unenthusiasm disinterest

Number of unenthusiastic disinterested episodes

Length of longest manic irritable episode

Severity of manic irritable episodes

F110 arithmetic sequence recognition

F111 antonym

F112 square sequence recognition

F113 subset inclusion logic

Previously smoked cigarettes on most all days

Able to walk or cycle unaided for 10 minutes

Number of cigarettes previously smoked daily current cigar pipe smokers

Age stopped smoking cigarettes current cigar pipe or previous cigarette smoker

Email access

Fluid intelligence score

Prospective memory result

Mean time to correctly identify matches

Job code deduced

Smoking status

Alcohol drinker status

Home area population density urban or rural

Current employment status corrected

Cascot confidence score

Bipolar disorder status

Single episode of probable major depression

Probable recurrent major depression moderate

Probable recurrent major depression severe

Bipolar and major depression status

Neuroticism score

Number of fluid intelligence questions attempted within time limit

Number of correct matches in round

Number of correct matches in round 0 1

Number of correct matches in round 0 2

Number of incorrect matches in round

Number of incorrect matches in round 0 1

|                                                                    |
|--------------------------------------------------------------------|
| Number of incorrect matches in round 0 2                           |
| Time to complete round                                             |
| Time to complete round 0 1                                         |
| Time to complete round 0 2                                         |
| When pairs test completed                                          |
| When fluid intelligence test completed                             |
| When trail making test completed                                   |
| When symbol digit substitution test completed                      |
| When numeric memory test completed                                 |
| When initial questions completed                                   |
| Ever smoked                                                        |
| F11 numeric addition test                                          |
| F12 identify largest number                                        |
| F13 word interpolation                                             |
| F14 positional arithmetic                                          |
| F15 family relationship calculation                                |
| F16 conditional arithmetic                                         |
| F17 synonym                                                        |
| F18 chained arithmetic                                             |
| F19 concept interpolation                                          |
| F110 arithmetic sequence recognition                               |
| F111 antonym                                                       |
| F112 square sequence recognition                                   |
| F113 subset inclusion logic                                        |
| Fluid intelligence score                                           |
| Number of fluid intelligence questions attempted within time limit |
| F114 alphanumeric substitution                                     |
| Number of symbol digit matches attempted                           |
| Maximum digits remembered correctly                                |
| Tobacco smoking                                                    |
| Age of stopping smoking                                            |
| Amount of tobacco currently smoked                                 |
| Number of jobs held                                                |
| Nitrogen dioxide air pollution 2010                                |
| Nitrogen oxides air pollution 2010                                 |
| Particulate matter air pollution pm10 2010                         |
| Particulate matter air pollution pm2 5 2010                        |
| Particulate matter air pollution pm2 5 absorbance 2010             |
| Particulate matter air pollution 2 5 10um 2010                     |
| Traffic intensity on the nearest road                              |
| Inverse distance to the nearest road                               |
| Traffic intensity on the nearest major road                        |
| Inverse distance to the nearest major road                         |
| Total traffic load on major roads                                  |
| Close to major road                                                |
| Sum of road length of major roads within 100m                      |
| Nitrogen dioxide air pollution 2005                                |
| Nitrogen dioxide air pollution 2006                                |
| Nitrogen dioxide air pollution 2007                                |
| Particulate matter air pollution pm10 2007                         |
| Average daytime sound level of noise pollution                     |
| Average evening sound level of noise pollution                     |
| Average night time sound level of noise pollution                  |
| Average 16 hour sound level of noise pollution                     |
| Average 24 hour sound level of noise pollution                     |
| Drinking water intake                                              |
| Alcohol consumed                                                   |
| Time spent doing vigorous physical activity                        |
| Time spent doing moderate physical activity                        |
| Time spent doing light physical activity                           |
| Ever addicted to any substance or behaviour                        |
| Amount of alcohol drunk on a typical drinking day                  |
| Ever physically dependent on alcohol                               |

Ever had known person concerned about or recommend reduction of alcohol consumption

Ever addicted to alcohol

Frequency of failure to fulfil normal expectations due to drinking alcohol in last year

Frequency of memory loss due to drinking alcohol in last year

Frequency of feeling guilt or remorse after drinking alcohol in last year

Age when known person last commented about drinking habits

Ever been injured or injured someone else through drinking alcohol

Frequency of needing morning drink of alcohol after heavy drinking session in last year

Frequency of inability to cease drinking in last year

Frequency of drinking alcohol

Ongoing addiction to alcohol

Frequency of consuming six or more units of alcohol

Tense sore or aching muscles during worst period of anxiety

Impact on normal roles during worst period of anxiety

Difficulty concentrating during worst period of anxiety

Longest period spent worried or anxious

Ever felt worried tense or anxious for most of a month or longer

More irritable than usual during worst period of anxiety

Keyed up or on edge during worst period of anxiety

Ever worried more than most people would in similar situation

Restless during period of worst anxiety

Frequent trouble falling or staying asleep during worst period of anxiety

Professional informed about anxiety

Easily tired during worst period of anxiety

Ever addicted to a behaviour or miscellaneous

Ongoing behavioural or miscellaneous addiction

Age at first episode of depression

Age at last episode of depression

Difficulty concentrating during worst depression

Fraction of day affected during worst episode of depression

Thoughts of death during worst depression

Duration of worst depression

Frequency of depressed days during worst episode of depression

Impact on normal roles during worst period of depression

Ever had prolonged loss of interest in normal activities

Lifetime number of depressed periods

Depression possibly related to childbirth

Ever had prolonged feelings of sadness or depression

Depression possibly related to stressful or traumatic event

Professional informed about depression

Feelings of tiredness during worst episode of depression

Feelings of worthlessness during worst period of depression

Ever taken cannabis

Maximum frequency of taking cannabis

Age when last took cannabis

Ever addicted to illicit or recreational drugs

Illicit or recreational drugs addiction or dependence ongoing

General happiness

General happiness with own health

Belief that own life is meaningful

Age when first had unusual or psychotic experience

Distress caused by unusual or psychotic experiences

Ever heard an unreal voice

Number of times heard an unreal voice

Ever prescribed a medication for unusual or psychotic experiences

Frequency of unusual or psychotic experiences in past year

Ever believed in an unreal conspiracy against self

Number of times believed in an unreal conspiracy against self

Ever seen an unreal vision

Number of times seen an unreal vision

Ever believed in unreal communications or signs

Number of times believed in unreal communications or signs

Ever talked to a health professional about unusual or psychotic experiences

Felt loved as a child

Someone to take to doctor when needed as a child

Longest period of mania or irritability

Severity of problems due to mania or irritability

Felt irritable or had angry outbursts in past month

Avoided activities or situations because of previous stressful experience in past month

Felt distant from other people in past month

Repeated disturbing thoughts of stressful experience in past month

Felt very upset when reminded of stressful experience in past month

Ever sought or received professional help for mental distress

Ever suffered mental distress preventing usual activities

Ever had period of mania excitability

Ever had period extreme irritability

Ever addicted to prescription or over the counter medication

Prescription or over the counter medication addiction or dependence ongoing

Recent easy annoyance or irritability

Recent feelings of nervousness or anxiety

Recent feelings of inadequacy

Recent trouble concentrating on things

Recent inability to stop or control worrying

Recent feelings of depression

Recent poor appetite or overeating

Recent feelings of foreboding

Recent thoughts of suicide or self harm

Recent lack of interest or pleasure in doing things

Recent trouble relaxing

Recent restlessness

Trouble falling or staying asleep or sleeping too much

Recent changes in speed amount of moving or speaking

Recent feelings of tiredness or low energy

Recent worrying too much about different things

Been in a confiding relationship as an adult

Able to pay rent mortgage as an adult

Been in serious accident believed to be life threatening

Been involved in combat or exposed to war zone

Diagnosed with life threatening illness

Victim of physically violent crime

Witnessed sudden violent death

Did your sleep change

Trouble falling asleep

Sleeping too much

Waking too early

Weight change during worst episode of depression

Frequency of difficulty controlling worry during worst period of anxiety

Worried most days during period of worst anxiety

Frequency of inability to stop worrying during worst period of anxiety

Multiple worries during worst period of anxiety

Difficulty stopping worrying during worst period of anxiety

Stronger worrying than other people during period of worst anxiety

Number of things worried about during worst period of anxiety

Current employment status employed

Current employment status retired

Current employment status family

Current employment status disabled

Current employment status unemployed

Current employment status voluntary

Current employment status student

Heating types in home gas

Heating types in home electricity

Heating types in home oil

Heating types in home paraffin

Heating types in home solid fuel

Heating types in home open fire

How are people in household related to participant partner  
How are people in household related to participant children  
How are people in household related to participant siblings  
How are people in household related to participant parents  
How are people in household related to participant grandparents  
How are people in household related to participant grandchildren  
How are people in household related to participant other related  
How are people in household related to participant other unrelated  
Illness injury bereavement stress in last 2 years illness self  
Illness injury bereavement stress in last 2 years illness relative  
Illness injury bereavement stress in last 2 years death relative  
Illness injury bereavement stress in last 2 years death spouse  
Illness injury bereavement stress in last 2 years divorce  
Illness injury bereavement stress in last 2 years financial difficulties  
Leisure social activities sports  
Leisure social activities pub  
Leisure social activities religion  
Leisure social activities adult class  
Leisure social activities other  
Manic hyper symptoms more active  
Manic hyper symptoms more talkative  
Manic hyper symptoms less sleep  
Manic hyper symptoms more creative  
Manic hyper symptoms all  
Mineral and other dietary supplements fish oil  
Mineral and other dietary supplements glucosamine  
Mineral and other dietary supplements calcium  
Mineral and other dietary supplements zinc  
Mineral and other dietary supplements iron  
Mineral and other dietary supplements selenium  
Never eat eggs dairy wheat sugar eggs  
Never eat eggs dairy wheat sugar dairy  
Never eat eggs dairy wheat sugar wheat  
Never eat eggs dairy wheat sugar sugar  
Never eat eggs dairy wheat sugar none  
Qualifications university  
Qualifications A levels  
Qualifications GCSEs  
Qualifications CSEs  
Qualifications NVQ  
Qualifications other  
Transport type for commuting to job workplace car  
Transport type for commuting to job workplace walk  
Transport type for commuting to job workplace public transport  
Transport type for commuting to job workplace cycle  
Type of special diet followed gluten free  
Type of special diet followed lactose free  
Type of special diet followed low calorie  
Type of special diet followed vegetarian  
Type of special diet followed vegan  
Type of special diet followed other  
Types of physical activity in last 4 weeks walking  
Types of physical activity in last 4 weeks other  
Types of physical activity in last 4 weeks light DIY  
Types of physical activity in last 4 weeks heavy DIY  
Types of transport used excluding work car  
Types of transport used excluding work walk  
Types of transport used excluding work public transport  
Types of transport used excluding work cycle  
Vitamin and mineral supplements A  
Vitamin and mineral supplements B  
Vitamin and mineral supplements C  
Vitamin and mineral supplements D



**Vitamin and mineral supplements E**

**Vitamin and mineral supplements folic acid**

**Vitamin and mineral supplements multi**

**Vitamin and or mineral supplement use\_dichotomised multi**

**Vitamin and or mineral supplement use\_dichotomised multi iron**

**Vitamin and or mineral supplement use\_dichotomised multi calcium**

**Vitamin and or mineral supplement use\_dichotomised multi minerals**

**Vitamin and or mineral supplement use\_dichotomised fish oil**

**Vitamin and or mineral supplement use\_dichotomised glucosamine**

**Vitamin and or mineral supplement use\_dichotomised evening primrose**

**Vitamin and or mineral supplement use\_dichotomised A**

**Vitamin and or mineral supplement use\_dichotomised B6**

**Vitamin and or mineral supplement use\_dichotomised B12**

**Vitamin and or mineral supplement use\_dichotomised C**

**Vitamin and or mineral supplement use\_dichotomised D**

**Vitamin and or mineral supplement use\_dichotomised E**

**Vitamin and or mineral supplement use\_dichotomised folic acid**

**Vitamin and or mineral supplement use\_dichotomised chromium**

**Vitamin and or mineral supplement use\_dichotomised magnesium**

**Vitamin and or mineral supplement use\_dichotomised selenium**

**Vitamin and or mineral supplement use\_dichotomised calcium**

**Vitamin and or mineral supplement use\_dichotomised iron**

**Vitamin and or mineral supplement use\_dichotomised zinc**

**Vitamin and or mineral supplement use\_dichotomised other**

**Why reduced smoking illness**

**Why reduced smoking doctor**

**Why reduced smoking health**

**Why reduced smoking financial**

**Why stopped smoking illness**

**Why stopped smoking doctor**

**Why stopped smoking health**

**Why stopped smoking financial**

**Supplementary Table 2:** The 104 target traits associated with schizophrenia polygenic risk scores (PRSs) at  $P < 1 \times 10^{-7}$  in the unaffected sub-cohort of the UK Biobank.

| Trait                                                                                            | Direction of effect | $P_{t < 0.05}$ PRS R2 | $P_{t < 0.05}$ PRS $P$ -value            | GW-sig $P$ -value                        | $N$           | Unaffected vs. cases different $P$ -value | Trait type                       |
|--------------------------------------------------------------------------------------------------|---------------------|-----------------------|------------------------------------------|------------------------------------------|---------------|-------------------------------------------|----------------------------------|
| <b>Number of incorrect matches in round 2 (Pair matching errors)</b>                             | +                   | <b>0.001</b>          | <b><math>2.94 \times 10^{-82}</math></b> | <b><math>3.14 \times 10^{-13}</math></b> | <b>307395</b> | <b><math>7.20 \times 10^{-01}</math></b>  | <b>Cognitive</b>                 |
| Number of fluid intelligence questions attempted within time limit                               | -                   | 0.003                 | $2.32 \times 10^{-76}$                   | $1.11 \times 10^{-27}$                   | 99466         | $9.37 \times 10^{-02}$                    | Cognitive                        |
| Seen doctor GP for nerves anxiety tension or depression                                          | +                   | 0.002                 | $9.99 \times 10^{-75}$                   | $1.57 \times 10^{-15}$                   | 305607        | $2.07 \times 10^{-176}$                   | Affective                        |
| Plays computer games                                                                             | -                   | 0.001                 | $2.71 \times 10^{-59}$                   | $2.56 \times 10^{-08}$                   | 307479        | $4.60 \times 10^{-06}$                    | Behavioural                      |
| Seen a psychiatrist for nerves anxiety tension or depression                                     | +                   | 0.002                 | $1.59 \times 10^{-58}$                   | $1.24 \times 10^{-16}$                   | 306579        | $1.15 \times 10^{-255}$                   | Affective                        |
| Time to complete round 2                                                                         | +                   | 0.001                 | $2.39 \times 10^{-57}$                   | $1.15 \times 10^{-16}$                   | 307395        | $2.46 \times 10^{-02}$                    | Cognitive                        |
| Mean time to correctly identify matches                                                          | +                   | 0.001                 | $2.36 \times 10^{-54}$                   | $1.70 \times 10^{-07}$                   | 305797        | $1.98 \times 10^{-25}$                    | Cognitive                        |
| <b>Oily fish intake</b>                                                                          | +                   | <b>0.001</b>          | <b><math>7.22 \times 10^{-54}</math></b> | <b><math>3.62 \times 10^{-20}</math></b> | <b>306254</b> | <b><math>5.01 \times 10^{-04}</math></b>  | <b>Behavioural</b>               |
| <b>Fluid intelligence score<sup>+</sup></b>                                                      | -                   | <b>0.002</b>          | <b><math>2.18 \times 10^{-53}</math></b> | <b><math>3.43 \times 10^{-15}</math></b> | <b>99466</b>  | <b><math>1.56 \times 10^{-17}</math></b>  | <b>Cognitive</b>                 |
| <b>Nervous feelings</b>                                                                          | +                   | <b>0.001</b>          | <b><math>1.25 \times 10^{-46}</math></b> | <b><math>2.09 \times 10^{-17}</math></b> | <b>300070</b> | <b><math>1.87 \times 10^{-67}</math></b>  | <b>Affective</b>                 |
| <b>Getting up in morning</b>                                                                     | -                   | <b>0.001</b>          | <b><math>5.05 \times 10^{-45}</math></b> | <b><math>2.26 \times 10^{-05}</math></b> | <b>307056</b> | <b><math>3.12 \times 10^{-37}</math></b>  | <b>Disorganisation</b>           |
| <b>Ever depressed for a whole week</b>                                                           | +                   | <b>0.003</b>          | <b><math>2.58 \times 10^{-44}</math></b> | <b><math>8.41 \times 10^{-11}</math></b> | <b>99725</b>  | <b><math>3.90 \times 10^{-30}</math></b>  | <b>Affective</b>                 |
| Time to complete round 1                                                                         | +                   | 0.001                 | $3.36 \times 10^{-44}$                   | $8.79 \times 10^{-11}$                   | 307395        | $2.66 \times 10^{-07}$                    | Cognitive                        |
| Ever unenthusiastic disinterested for a whole week                                               | +                   | 0.003                 | $1.07 \times 10^{-43}$                   | $8.00 \times 10^{-10}$                   | 97754         | $7.98 \times 10^{-28}$                    | Affective                        |
| Frequency of tenseness restlessness in last 2 weeks                                              | +                   | 0.001                 | $1.67 \times 10^{-43}$                   | $2.02 \times 10^{-09}$                   | 296554        | $2.51 \times 10^{-38}$                    | Affective                        |
| <b>BMI</b>                                                                                       | -                   | <b>0.001</b>          | <b><math>1.05 \times 10^{-41}</math></b> | <b><math>2.82 \times 10^{-13}</math></b> | <b>306919</b> | <b><math>4.93 \times 10^{-18}</math></b>  | <b>Disorganisation/behaviour</b> |
| Number of incorrect matches in round 1                                                           | +                   | 0.001                 | $6.88 \times 10^{-40}$                   | $1.16 \times 10^{-07}$                   | 307395        | $2.28 \times 10^{-06}$                    | Cognitive                        |
| <b>Neuroticism score (Neuroticism)</b>                                                           | +                   | <b>0.001</b>          | <b><math>7.82 \times 10^{-40}</math></b> | <b><math>2.16 \times 10^{-12}</math></b> | <b>250454</b> | <b><math>5.05 \times 10^{-64}</math></b>  | <b>Affective</b>                 |
| <b>Number of days week of moderate physical activity 10 minutes (Moderate physical activity)</b> | +                   | <b>0.001</b>          | <b><math>2.03 \times 10^{-38}</math></b> | <b><math>3.85 \times 10^{-14}</math></b> | <b>293844</b> | <b><math>2.15 \times 10^{-09}</math></b>  | <b>Behavioural</b>               |
| <b>Self-reported risk taking (Risk taking)</b>                                                   | +                   | <b>0.001</b>          | <b><math>3.00 \times 10^{-38}</math></b> | <b><math>5.78 \times 10^{-07}</math></b> | <b>297101</b> | <b><math>1 \times 10^{-308}</math></b>    | <b>Behavioural</b>               |

|                                                                                         |          |              |                              |                              |               |                              |                              |
|-----------------------------------------------------------------------------------------|----------|--------------|------------------------------|------------------------------|---------------|------------------------------|------------------------------|
| Reason for reducing amount of alcohol drunk                                             | -        | 0.001        | 2.46x10 <sup>-35</sup>       | 4.28x10 <sup>-03</sup>       | 112644        | 5.60x10 <sup>-23</sup>       | Behavioural                  |
| <b>Family relationship satisfaction</b>                                                 | <b>+</b> | <b>0.001</b> | <b>6.65x10<sup>-35</sup></b> | <b>1.92x10<sup>-06</sup></b> | <b>100952</b> | <b>1.26x10<sup>-22</sup></b> | <b>Affective</b>             |
| <b>Current smoking status (Smoking)</b>                                                 | <b>+</b> | <b>0.000</b> | <b>5.45x10<sup>-34</sup></b> | <b>6.04x10<sup>-03</sup></b> | <b>306505</b> | <b>5.02x10<sup>-30</sup></b> | <b>Behavioural</b>           |
| Why stopped smoking health                                                              | +        | 0.001        | 9.60x10 <sup>-34</sup>       | 9.55x10 <sup>-13</sup>       | 59132         | 3.28x10 <sup>-03</sup>       | Behavioural                  |
| Worrier anxious feelings                                                                | +        | 0.001        | 1.70x10 <sup>-33</sup>       | 2.53x10 <sup>-13</sup>       | 299507        | 2.68x10 <sup>-11</sup>       | Affective                    |
| Time to answer                                                                          | +        | 0.001        | 3.79x10 <sup>-31</sup>       | 6.69x10 <sup>-09</sup>       | 101682        | 7.45x10 <sup>-02</sup>       | Cognitive                    |
| <b>Guilty feelings</b>                                                                  | <b>+</b> | <b>0.001</b> | <b>5.47x10<sup>-30</sup></b> | <b>2.22x10<sup>-09</sup></b> | <b>299852</b> | <b>5.33x10<sup>-25</sup></b> | <b>Affective</b>             |
| Frequency of depressed mood in last 2 weeks                                             | +        | 0.000        | 1.27x10 <sup>-29</sup>       | 7.21x10 <sup>-10</sup>       | 295142        | 1.68x10 <sup>-40</sup>       | Affective                    |
| Frequency of unenthusiasm disinterest in last 2 weeks                                   | +        | 0.000        | 1.06x10 <sup>-28</sup>       | 3.10x10 <sup>-07</sup>       | 298216        | 2.94x10 <sup>-38</sup>       | Affective                    |
| <b>Tea intake</b>                                                                       | <b>+</b> | <b>0.000</b> | <b>1.69x10<sup>-28</sup></b> | <b>4.23x10<sup>-01</sup></b> | <b>297475</b> | <b>1.44x10<sup>-03</sup></b> | <b>Behavioural</b>           |
| <b>Felt loved as a child</b>                                                            | <b>-</b> | <b>0.001</b> | <b>3.29x10<sup>-28</sup></b> | <b>1.39x10<sup>-01</sup></b> | <b>83605</b>  | <b>5.37x10<sup>-04</sup></b> | <b>Affective</b>             |
| Past tobacco smoking                                                                    | -        | 0.000        | 1.01x10 <sup>-26</sup>       | 1.72x10 <sup>-04</sup>       | 288806        | 2.35x10 <sup>-02</sup>       | Behavioural                  |
| Non-oily fish intake                                                                    | +        | 0.000        | 9.22x10 <sup>-26</sup>       | 2.60x10 <sup>-12</sup>       | 306525        | 5.62x10 <sup>-07</sup>       | Behavioural                  |
| Frequency of tiredness lethargy in last 2 weeks                                         | +        | 0.000        | 1.19x10 <sup>-24</sup>       | 3.78x10 <sup>-06</sup>       | 298429        | 2.65x10 <sup>-36</sup>       | Motor                        |
| <b>Friendship satisfaction</b>                                                          | <b>+</b> | <b>0.001</b> | <b>2.17x10<sup>-24</sup></b> | <b>5.67x10<sup>-04</sup></b> | <b>100886</b> | <b>6.72x10<sup>-12</sup></b> | <b>Affective</b>             |
| <b>Length of time at current address</b>                                                | <b>-</b> | <b>0.000</b> | <b>7.52x10<sup>-24</sup></b> | <b>2.61x10<sup>-06</sup></b> | <b>300865</b> | <b>5.44x10<sup>-04</sup></b> | <b>Behavioural</b>           |
| Number of correct matches in round 2                                                    | -        | 0.000        | 1.26x10 <sup>-22</sup>       | 1.29x10 <sup>-03</sup>       | 307395        | 7.97x10 <sup>-18</sup>       | Cognitive                    |
| <b>Cooked vegetable intake</b>                                                          | <b>+</b> | <b>0.000</b> | <b>6.35x10<sup>-22</sup></b> | <b>5.21x10<sup>-04</sup></b> | <b>298869</b> | <b>7.70x10<sup>-02</sup></b> | <b>Behavioural</b>           |
| <b>Sensitivity hurt feelings</b>                                                        | <b>+</b> | <b>0.000</b> | <b>1.74x10<sup>-21</sup></b> | <b>8.72x10<sup>-10</sup></b> | <b>298692</b> | <b>5.05x10<sup>-12</sup></b> | <b>Affective</b>             |
| Avoided activities or situations because of previous stressful experience in past month | +        | 0.001        | 5.06x10 <sup>-21</sup>       | 7.16x10 <sup>-02</sup>       | 83805         | 2.47x10 <sup>-05</sup>       | Affective                    |
| PM initial answer                                                                       | -        | 0.001        | 1.04x10 <sup>-20</sup>       | 2.99x10 <sup>-06</sup>       | 101664        | 3.83x10 <sup>-08</sup>       | Cognitive                    |
| Number of correct matches in round 1                                                    | -        | 0.000        | 2.38x10 <sup>-20</sup>       | 9.99x10 <sup>-03</sup>       | 307396        | 5.21x10 <sup>-17</sup>       | Cognitive                    |
| Bipolar and major depression status                                                     | +        | 0.001        | 2.65x10 <sup>-20</sup>       | 2.33x10 <sup>-07</sup>       | 73573         | 2.71x10 <sup>-18</sup>       | Affective                    |
| Duration screen displayed                                                               | +        | 0.001        | 3.47x10 <sup>-20</sup>       | 1.76x10 <sup>-06</sup>       | 101682        | 8.13x10 <sup>-07</sup>       | Cognitive                    |
| Happiness                                                                               | +        | 0.001        | 5.45x10 <sup>-20</sup>       | 7.57x10 <sup>-06</sup>       | 101565        | 4.16x10 <sup>-13</sup>       | Affective                    |
| Ever felt worried tense or anxious for most of a month or longer                        | +        | 0.002        | 5.68x10 <sup>-19</sup>       | 2.72x10 <sup>-03</sup>       | 80410         | 2.96x10 <sup>-06</sup>       | Affective                    |
| Vitamin and mineral supplements C                                                       | +        | 0.001        | 6.41x10 <sup>-19</sup>       | 3.84x10 <sup>-07</sup>       | 307812        | 6.25x10 <sup>-01</sup>       | Behavioural                  |
| <b>Nap during day</b>                                                                   | <b>+</b> | <b>0.000</b> | <b>6.79x10<sup>-19</sup></b> | <b>6.98x10<sup>-06</sup></b> | <b>307469</b> | <b>4.75x10<sup>-34</sup></b> | <b>Motor/disorganisation</b> |
| How are people in household related                                                     | -        | 0.000        | 1.06x10 <sup>-18</sup>       | 2.21x10 <sup>-02</sup>       | 307812        | 1.60x10 <sup>-106</sup>      | Behavioural                  |

|                                                                     |   |       |                        |                        |        |                         |                   |  |
|---------------------------------------------------------------------|---|-------|------------------------|------------------------|--------|-------------------------|-------------------|--|
| to participant partner                                              |   |       |                        |                        |        |                         |                   |  |
| Repeated disturbing thoughts of stressful experience in past month  | + | 0.001 | 1.08x10 <sup>-18</sup> | 2.97x10 <sup>-02</sup> | 83808  | 4.51x10 <sup>-04</sup>  | Delusions         |  |
| Time spent watching television TV                                   | - | 0.000 | 1.62x10 <sup>-18</sup> | 6.04x10 <sup>-01</sup> | 290951 | 2.90x10 <sup>-09</sup>  | Behavioural       |  |
| Number of days week of vigorous physical activity 1 minutes         | + | 0.000 | 3.94x10 <sup>-18</sup> | 1.02x10 <sup>-05</sup> | 293799 | 3.81x10 <sup>-08</sup>  | Behavioural/motor |  |
| Ever suffered mental distress preventing usual activities           | + | 0.002 | 3.92x10 <sup>-17</sup> | 7.80x10 <sup>-02</sup> | 82792  | 1.53x10 <sup>-25</sup>  | Affective         |  |
| Number of vehicles in household                                     | - | 0.000 | 5.19x10 <sup>-17</sup> | 2.11x10 <sup>-02</sup> | 305805 | 2.81x10 <sup>-138</sup> | Behavioural       |  |
| Pork intake                                                         | - | 0.000 | 8.12x10 <sup>-17</sup> | 3.52x10 <sup>-03</sup> | 306068 | 9.79x10 <sup>-01</sup>  | Behavioural       |  |
| Types of transport used excluding work car                          | - | 0.000 | 1.23x10 <sup>-16</sup> | 5.11x10 <sup>-02</sup> | 307812 | 2.79x10 <sup>-90</sup>  | Behavioural       |  |
| Felt very upset when reminded of stressful experience in past month | + | 0.001 | 1.30x10 <sup>-16</sup> | 4.59x10 <sup>-01</sup> | 83794  | 6.14x10 <sup>-05</sup>  | Affective         |  |
| Age first had sexual intercourse                                    | - | 0.000 | 5.03x10 <sup>-16</sup> | 4.67x10 <sup>-04</sup> | 269875 | 7.74x10 <sup>-01</sup>  | Behavioural       |  |
| Sleep duration                                                      | + | 0.000 | 6.99x10 <sup>-16</sup> | 3.13x10 <sup>-04</sup> | 306190 | 1.06x10 <sup>-08</sup>  | Motor             |  |
| Mineral and other dietary supplements zinc                          | + | 0.001 | 1.45x10 <sup>-15</sup> | 5.55x10 <sup>-05</sup> | 307812 | 6.85x10 <sup>-03</sup>  | Behavioural       |  |
| Qualifications GCSx10s                                              | - | 0.000 | 3.69x10 <sup>-15</sup> | 2.58x10 <sup>-01</sup> | 307812 | 1.72x10 <sup>-03</sup>  | Behavioural       |  |
| Vitamin and mineral supplements x10                                 | + | 0.001 | 7.28x10 <sup>-15</sup> | 1.46x10 <sup>-04</sup> | 307812 | 2.61x10 <sup>-01</sup>  | Behavioural       |  |
| Vitamin and mineral supplements A                                   | + | 0.001 | 4.74x10 <sup>-14</sup> | 1.08x10 <sup>-06</sup> | 307812 | 1.69x10 <sup>-02</sup>  | Behavioural       |  |
| Leisure social activities adult class                               | + | 0.000 | 9.18x10 <sup>-14</sup> | 1.77x10 <sup>-03</sup> | 307812 | 1.51x10 <sup>-02</sup>  | Behavioural       |  |
| Overall health rating                                               | + | 0.000 | 1.15x10 <sup>-13</sup> | 2.97x10 <sup>-01</sup> | 306588 | 5.15x10 <sup>-68</sup>  | Behavioural       |  |
| Loneliness isolation                                                | + | 0.000 | 4.98x10 <sup>-13</sup> | 1.81x10 <sup>-02</sup> | 303135 | 2.40x10 <sup>-48</sup>  | Affective         |  |
| Worry too long after embarrassment                                  | + | 0.000 | 1.11x10 <sup>-12</sup> | 3.46x10 <sup>-02</sup> | 295015 | 1.12x10 <sup>-15</sup>  | Affective         |  |
| Number of pregnancy terminations                                    | + | 0.001 | 1.76x10 <sup>-12</sup> | 2.11x10 <sup>-03</sup> | 48343  | 7.68x10 <sup>-03</sup>  | Behavioural       |  |
| Ever had prolonged loss of interest in normal activities            | + | 0.001 | 2.75x10 <sup>-12</sup> | 1.22x10 <sup>-04</sup> | 83678  | 2.25x10 <sup>-16</sup>  | Negative          |  |
| Number of attempts                                                  | + | 0.000 | 3.19x10 <sup>-12</sup> | 1.10x10 <sup>-02</sup> | 101682 | 9.65x10 <sup>-03</sup>  | Affective         |  |
| Ever sought or received professional help for mental distress       | + | 0.001 | 3.37x10 <sup>-12</sup> | 1.00x10 <sup>-02</sup> | 83656  | 1x10 <sup>-308</sup>    | Affective         |  |

|                                                               |   |       |                        |                        |        |                         |                   |
|---------------------------------------------------------------|---|-------|------------------------|------------------------|--------|-------------------------|-------------------|
| Qualifications university                                     | + | 0.000 | 4.44x10 <sup>-12</sup> | 3.36x10 <sup>-01</sup> | 307812 | 1.20x10 <sup>-22</sup>  | Behavioural       |
| Loud music exposure frequency                                 | + | 0.000 | 7.09x10 <sup>-12</sup> | 1.92x10 <sup>-02</sup> | 100541 | 8.46x10 <sup>-05</sup>  | Behavioural       |
| Felt hated by family member as a child                        | + | 0.001 | 8.49x10 <sup>-12</sup> | 2.72x10 <sup>-01</sup> | 83737  | 8.98x10 <sup>-04</sup>  | Affective         |
| Length of mobile phone use                                    | - | 0.000 | 3.45x10 <sup>-11</sup> | 3.82x10 <sup>-01</sup> | 303951 | 1.85x10 <sup>-33</sup>  | Behavioural       |
| Belittlement by partner or ex-partner as an adult             | + | 0.001 | 4.13x10 <sup>-11</sup> | 3.68x10 <sup>-01</sup> | 83687  | 4.03x10 <sup>-03</sup>  | Behavioural       |
| Current tobacco smoking                                       | + | 0.000 | 6.06x10 <sup>-11</sup> | 1.67x10 <sup>-01</sup> | 307490 | 9.50x10 <sup>-27</sup>  | Behavioural       |
| Coffee intake                                                 | - | 0.000 | 6.88x10 <sup>-11</sup> | 1.32x10 <sup>-05</sup> | 285407 | 1.71x10 <sup>-07</sup>  | Behavioural       |
| Vitamin and mineral supplements B                             | + | 0.000 | 1.20x10 <sup>-10</sup> | 4.85x10 <sup>-03</sup> | 307812 | 1.10x10 <sup>-03</sup>  | Behavioural       |
| Recent feelings of nervousness or anxiety                     | + | 0.000 | 1.43x10 <sup>-10</sup> | 3.90x10 <sup>-05</sup> | 83610  | 2.30x10 <sup>-03</sup>  | Affective         |
| Ever thought that life not worth living                       | + | 0.000 | 1.99x10 <sup>-10</sup> | 1.80x10 <sup>-01</sup> | 83477  | 4.46x10 <sup>-10</sup>  | Affective         |
| Types of physical activity in last 4 weeks heavy DIY          | - | 0.000 | 2.50x10 <sup>-10</sup> | 1.20x10 <sup>-01</sup> | 307812 | 9.40x10 <sup>-57</sup>  | Motor             |
| Ever worried more than most people would in similar situation | + | 0.001 | 2.50x10 <sup>-10</sup> | 1.07x10 <sup>-02</sup> | 72425  | 2.19x10 <sup>-11</sup>  | Affective         |
| Ever highly irritable argumentative for 2 days                | + | 0.001 | 2.74x10 <sup>-10</sup> | 1.33x10 <sup>-01</sup> | 99716  | 5.39x10 <sup>-09</sup>  | Affective         |
| Beef intake                                                   | - | 0.000 | 2.88x10 <sup>-10</sup> | 1.22x10 <sup>-01</sup> | 306645 | 2.50x10 <sup>-04</sup>  | Behavioural       |
| F13 word interpolation                                        | - | 0.000 | 3.76x10 <sup>-10</sup> | 4.36x10 <sup>-03</sup> | 98680  | 3.72x10 <sup>-04</sup>  | Cognitive         |
| Average weekly beer plus cider intake                         | + | 0.000 | 5.16x10 <sup>-10</sup> | 1.42x10 <sup>-01</sup> | 224335 | 3.94x10 <sup>-08</sup>  | Behavioural       |
| Mood swings                                                   | + | 0.000 | 8.63x10 <sup>-10</sup> | 3.55x10 <sup>-04</sup> | 300051 | 4.78x10 <sup>-29</sup>  | Affective         |
| Types of transport used excluding work walk                   | - | 0.000 | 1.22x10 <sup>-09</sup> | 1.69x10 <sup>-03</sup> | 307812 | 1.58x10 <sup>-03</sup>  | Behavioural       |
| Transport type for commuting to job workplace car             | - | 0.000 | 3.37x10 <sup>-09</sup> | 2.15x10 <sup>-01</sup> | 307812 | 3.01x10 <sup>-194</sup> | Behavioural/motor |
| Victim of physically violent crime                            | + | 0.000 | 4.67x10 <sup>-09</sup> | 7.91x10 <sup>-02</sup> | 83793  | 5.37x10 <sup>-03</sup>  | Behavioural       |
| Ever contemplated self-harm                                   | + | 0.000 | 8.59x10 <sup>-09</sup> | 1.15x10 <sup>-01</sup> | 83704  | 1.76x10 <sup>-07</sup>  | Affective         |
| Snoring                                                       | + | 0.000 | 1.21x10 <sup>-08</sup> | 9.21x10 <sup>-01</sup> | 287640 | 3.65x10 <sup>-03</sup>  | Behavioural/motor |
| Felt distant from other people in past month                  | + | 0.001 | 1.85x10 <sup>-08</sup> | 1.71x10 <sup>-01</sup> | 31346  | 1.58x10 <sup>-04</sup>  | Affective         |
| Number of unsuccessful stop smoking attempts                  | + | 0.000 | 2.70x10 <sup>-08</sup> | 3.50x10 <sup>-02</sup> | 68272  | 1.39x10 <sup>-01</sup>  | Behavioural       |
| Someone to take to doctor when needed as a child              | - | 0.000 | 3.18x10 <sup>-08</sup> | 3.04x10 <sup>-02</sup> | 83422  | 1.30x10 <sup>-01</sup>  | Behavioural       |

|                                                        |   |       |                        |                        |        |                         |                       |
|--------------------------------------------------------|---|-------|------------------------|------------------------|--------|-------------------------|-----------------------|
| Average total household income before tax              | - | 0.000 | 3.33x10 <sup>-08</sup> | 3.34x10 <sup>-03</sup> | 264483 | 6.66x10 <sup>-134</sup> | Behavioural           |
| Physical violence by partner or ex-partner as an adult | + | 0.000 | 3.48x10 <sup>-08</sup> | 5.85x10 <sup>-01</sup> | 83707  | 6.27x10 <sup>-01</sup>  | Behavioural           |
| Morning evening person chronotype                      | + | 0.000 | 3.76x10 <sup>-08</sup> | 3.91x10 <sup>-01</sup> | 274298 | 3.71x10 <sup>-10</sup>  | Motor/disorganisation |
| Health satisfaction                                    | + | 0.000 | 3.99x10 <sup>-08</sup> | 2.59x10 <sup>-01</sup> | 101574 | 3.65x10 <sup>-03</sup>  | Disorganisation       |
| Age at first episode of depression                     | - | 0.001 | 6.43x10 <sup>-08</sup> | 2.84x10 <sup>-01</sup> | 32234  | 4.91x10 <sup>-06</sup>  | Affective             |
| Ever manic hyper for 2 days                            | + | 0.001 | 7.13x10 <sup>-08</sup> | 5.45x10 <sup>-02</sup> | 99666  | 1.31x10 <sup>-25</sup>  | Delusions             |
| Recent worrying too much about different things        | + | 0.000 | 8.48x10 <sup>-08</sup> | 1.78x10 <sup>-03</sup> | 83578  | 7.52x10 <sup>-04</sup>  | Affective             |
| Frequency of walking for pleasure in last 4 weeks      | + | 0.000 | 9.98x10 <sup>-08</sup> | 2.80x10 <sup>-03</sup> | 222295 | 4.40x10 <sup>-04</sup>  | Behavioural           |

GW-Sig PRS = PRS comprising only genome-wide significant ( $P_T < 5 \times 10^{-8}$ ). Top non-overlapping and distinct traits in bold selected for Fig. 1 of the Main Text (*names given in Fig. 1 provided in parentheses if different*). The two last columns show the result ( $P$ -value) of a difference-in-means t-test between the target trait value among individuals diagnosed with schizophrenia and with unaffected individuals; and the traits categorised by schizophrenia symptom type respectively. + Fluid intelligence assessed by a simple 13 question verbal-numerical reasoning test.

**Supplementary Table 3: Associations between self-reported risk-taking and measures of migration, substance use and control traits**

|                                                 | Effect ( $\beta$ ):<br>adjusted<br>for age<br>and sex | R <sup>2</sup> : adjusted<br>for age and<br>sex | P-value:<br>adjusted for<br>age and sex | P-value:<br>adjusted for<br>age, sex and<br>TDEP | P-value: adjusted<br>for age, sex, TDEP<br>and EDU |
|-------------------------------------------------|-------------------------------------------------------|-------------------------------------------------|-----------------------------------------|--------------------------------------------------|----------------------------------------------------|
| Ever smoked cannabis                            | 0.23                                                  | 0.11                                            | < 10 <sup>-308</sup>                    | < 10 <sup>-308</sup>                             | < 10 <sup>-308</sup>                               |
| Time at current residence                       | -2.23                                                 | 0.00664                                         | < 10 <sup>-308</sup>                    | < 10 <sup>-308</sup>                             | < 10 <sup>-308</sup>                               |
| Left hand grip strength                         | 0.651                                                 | 0.000627                                        | 1.32x10 <sup>-143</sup>                 | 1.23x10 <sup>-200</sup>                          | 9.95x10 <sup>-181</sup>                            |
| Population density: current residence           | 204                                                   | 0.00149                                         | 3.19x10 <sup>-136</sup>                 | 4.94x10 <sup>-50</sup>                           | 7.28x10 <sup>-24</sup>                             |
| Distance travelled: birth to current            | 10800                                                 | 0.00131                                         | 2.61x10 <sup>-123</sup>                 | 1.14x10 <sup>-133</sup>                          | 2.38x10 <sup>-67</sup>                             |
| Self-reported substance abuse                   | 1.85 <sup>+</sup>                                     | 0.00771 <sup><math>\alpha</math></sup>          | 7.94x10 <sup>-74</sup>                  | 5.52x10 <sup>-55</sup>                           | 3.93x10 <sup>-62</sup>                             |
| Breast fed                                      | 1.16 <sup>+</sup>                                     | 0.00115 <sup><math>\alpha</math></sup>          | 4.67x10 <sup>-67</sup>                  | 2.39x10 <sup>-68</sup>                           | 5.95x10 <sup>-51</sup>                             |
| Leg pain on walking                             | 1.23 <sup>+</sup>                                     | 0.00229 <sup><math>\alpha</math></sup>          | 2.55x10 <sup>-56</sup>                  | 3.85x10 <sup>-38</sup>                           | 1.52x10 <sup>-52</sup>                             |
| Population density difference: birth to current | 127                                                   | 0.000389                                        | 7.13x10 <sup>-37</sup>                  | 2.31x10 <sup>-09</sup>                           | 0.0252                                             |
| Population density: birth place                 | 76.8                                                  | 0.000198                                        | 1.50x10 <sup>-19</sup>                  | 1.67x10 <sup>-10</sup>                           | 2.44x10 <sup>-10</sup>                             |
| Birth weight                                    | 0.0254                                                | 0.000271                                        | 1.39x 10 <sup>-17</sup>                 | 4.53x10 <sup>-20</sup>                           | 1.45x10 <sup>-16</sup>                             |
| Birth weight known                              | 0.96 <sup>+</sup>                                     | 9.45x10 <sup>-05<math>\alpha</math></sup>       | 2.80x10 <sup>-09</sup>                  | 0.000935                                         | 4.39x10 <sup>-05</sup>                             |
| Blood pressure device ID                        | 156000                                                | 2.50x10 <sup>-06</sup>                          | 0.277                                   | 0.267                                            | 0.331                                              |
| Month attended baseline assessment              | -0.00327                                              | 1.87x10 <sup>-07</sup>                          | 0.766                                   | 0.778                                            | 0.86                                               |

+ Odds ratio for binary outcome variables;  $\alpha$  Pseudo R<sup>2</sup> for binary outcome variables; TDEP = Townsend deprivation index; EDU = Educational attainment

**Supplementary Table 4: Summary of PRS results corresponding to the most predictive PRS for schizophrenia tested against the target behavioural and control traits**

|                                                 | Effect ( $\beta$ ):<br>adjusted<br>for age<br>and sex | R <sup>2</sup> : adjusted<br>for age and<br>sex | P-value:<br>adjusted for<br>age and sex | P-value:<br>adjusted for<br>age, sex and<br>TDEP | P-value: adjusted<br>for age, sex, TDEP<br>and EDU |
|-------------------------------------------------|-------------------------------------------------------|-------------------------------------------------|-----------------------------------------|--------------------------------------------------|----------------------------------------------------|
| Time at current residence                       | -738.61                                               | 0.00027                                         | 1.13x10 <sup>-21</sup>                  | 2.32x10 <sup>-21</sup>                           | 9.07x10 <sup>-20</sup>                             |
| Population density: current residence           | 104222                                                | 5.74x10 <sup>-05</sup>                          | 3.28x10 <sup>-11</sup>                  | 8.84x10 <sup>-07</sup>                           | 8.65x10 <sup>-06</sup>                             |
| Self-reported substance abuse                   | 633.75 <sup>+</sup>                                   | 0.00168 <sup><math>\alpha</math></sup>          | 3.78x10 <sup>-09</sup>                  | 8.75x10 <sup>-09</sup>                           | 1.34x10 <sup>-08</sup>                             |
| Ever smoked cannabis                            | 13.04                                                 | 0.00033                                         | 7.01x10 <sup>-08</sup>                  | 3.02x10 <sup>-07</sup>                           | 1.17x10 <sup>-06</sup>                             |
| Distance travelled: birth to current            | -9246200                                              | 9.32x10 <sup>-06</sup>                          | 0.0005                                  | 0.0008                                           | 0.0002                                             |
| Blood pressure device ID                        | -670154                                               | 0.00014                                         | 0.0029                                  | 0.0029                                           | 0.0029                                             |
| Left hand grip strength                         | -888.61                                               | 1.15x10 <sup>-05</sup>                          | 0.0054                                  | 0.0421                                           | 0.0233                                             |
| Population density difference: birth to current | 43655.70                                              | 2.11x10 <sup>-05</sup>                          | 0.0061                                  | 0.0500                                           | 0.1656                                             |
| Breast fed                                      | 10.41 <sup>+</sup>                                    | 2.08x10 <sup>-05<math>\alpha</math></sup>       | 0.0585                                  | 0.0432                                           | 0.0784                                             |
| Population density: birth place                 | 91061.90                                              | 1.03x10 <sup>-05</sup>                          | 0.0673                                  | 0.1019                                           | 0.0609                                             |
| Month attended baseline assessment              | 33.70                                                 | 8.32x10 <sup>-06</sup>                          | 0.0989                                  | 0.0885                                           | 0.0987                                             |
| Leg pain on walking                             | 113.19 <sup>+</sup>                                   | 2.40x10 <sup>-05<math>\alpha</math></sup>       | 0.2134                                  | 0.3905                                           | 0.2845                                             |
| Birth weight known                              | 59.44 <sup>+</sup>                                    | 2.88x10 <sup>-06<math>\alpha</math></sup>       | 0.3291                                  | 0.4623                                           | 0.3974                                             |
| Birth weight                                    | -4.56                                                 | 3.74x10 <sup>-06</sup>                          | 0.4134                                  | 0.4639                                           | 0.4058                                             |

+ Odds ratio for binary outcome variables;  $\alpha$  Pseudo R<sup>2</sup> for binary outcome variables; TDEP = Townsend deprivation index; EDU = Educational attainment

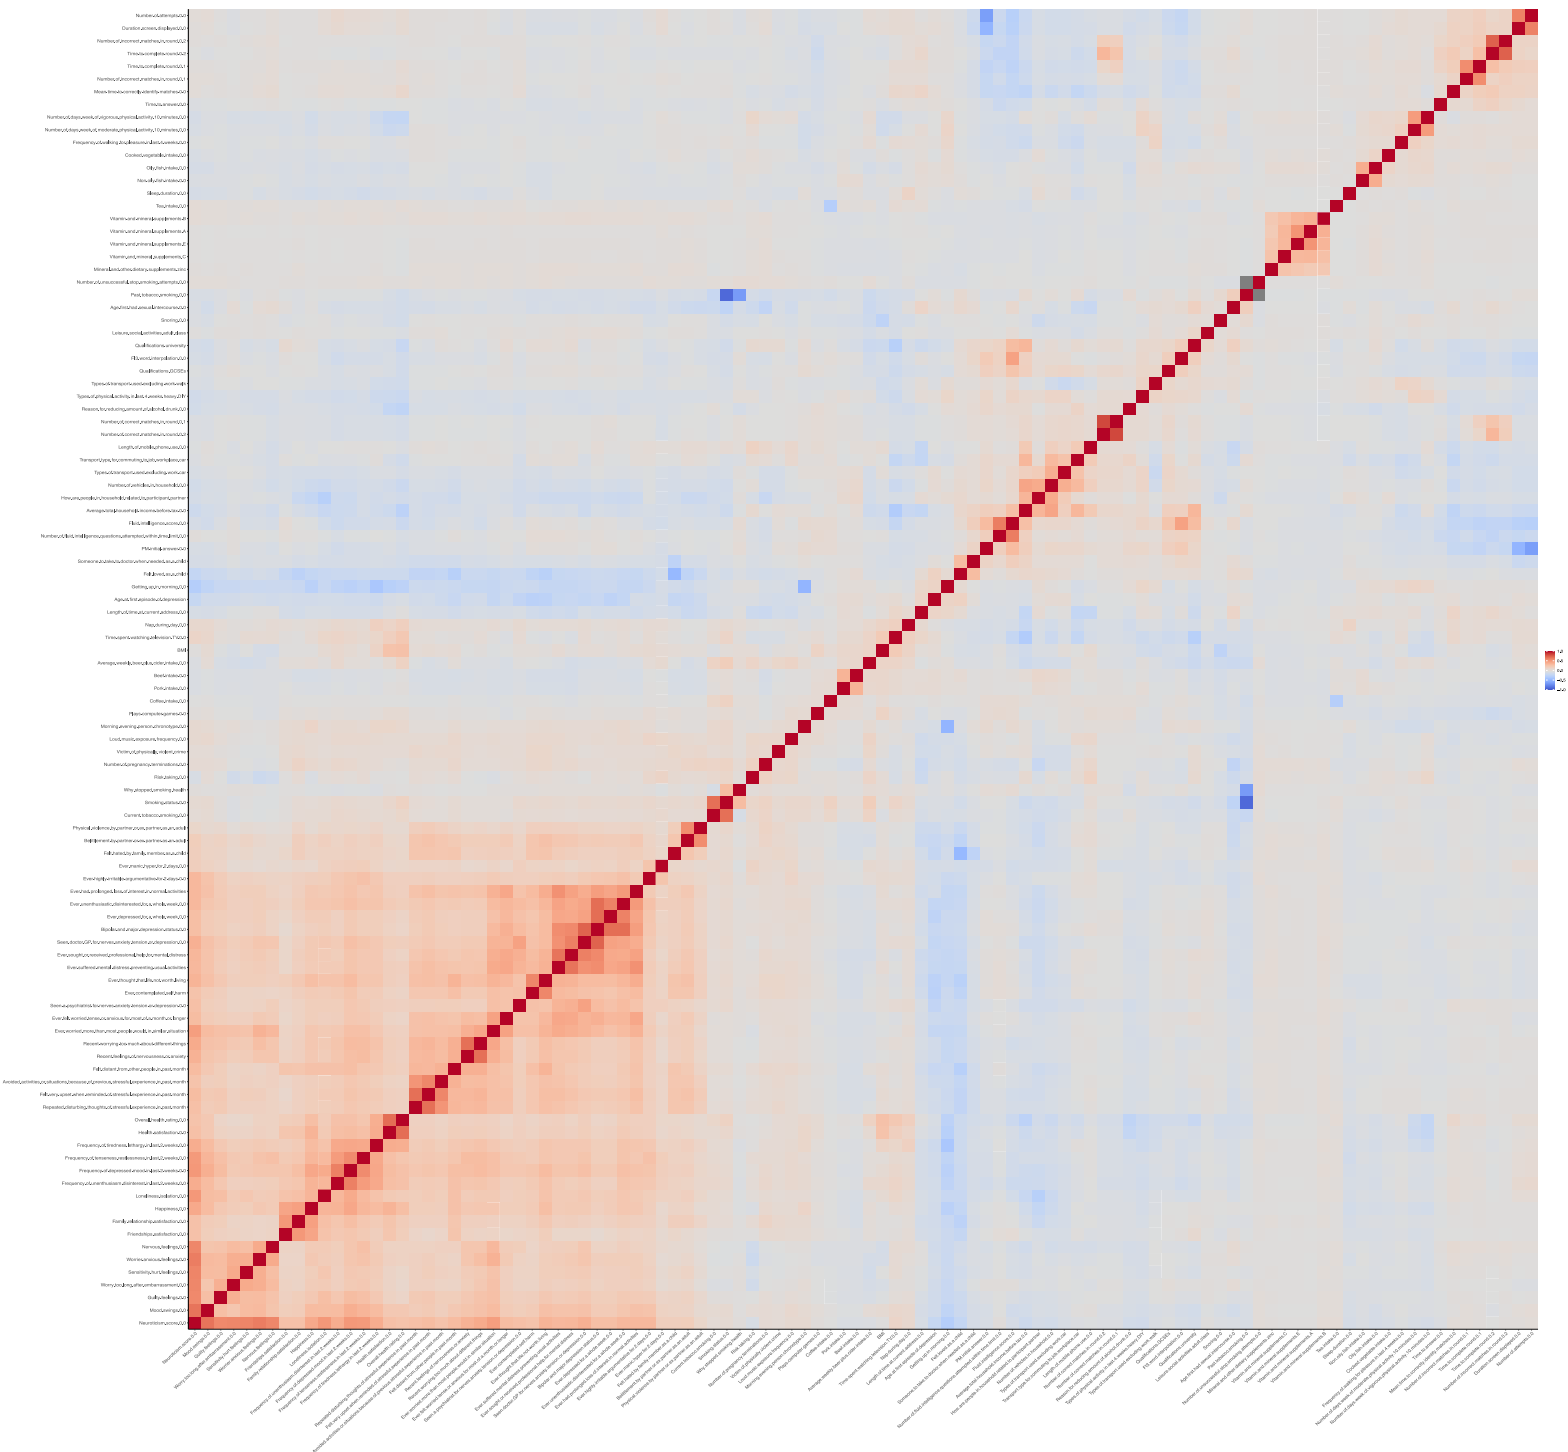

**Supplementary Figure 1.** Correlation matrix showing phenotypic correlations between the 104 target traits associated with schizophrenia PRS at  $P < 1 \times 10^{-7}$ . Not including same variable correlations, there are 10712 correlations in total, with a median  $r^2$  of 0.01. 20% of the correlations are  $r^2 > 0.01$ ; 6.8% are  $r^2 > 0.05$ ; and 2.7% are  $r^2 > 0.1$ . This demonstrates overall weak intercorrelation between the behavioural traits included in the analysis.



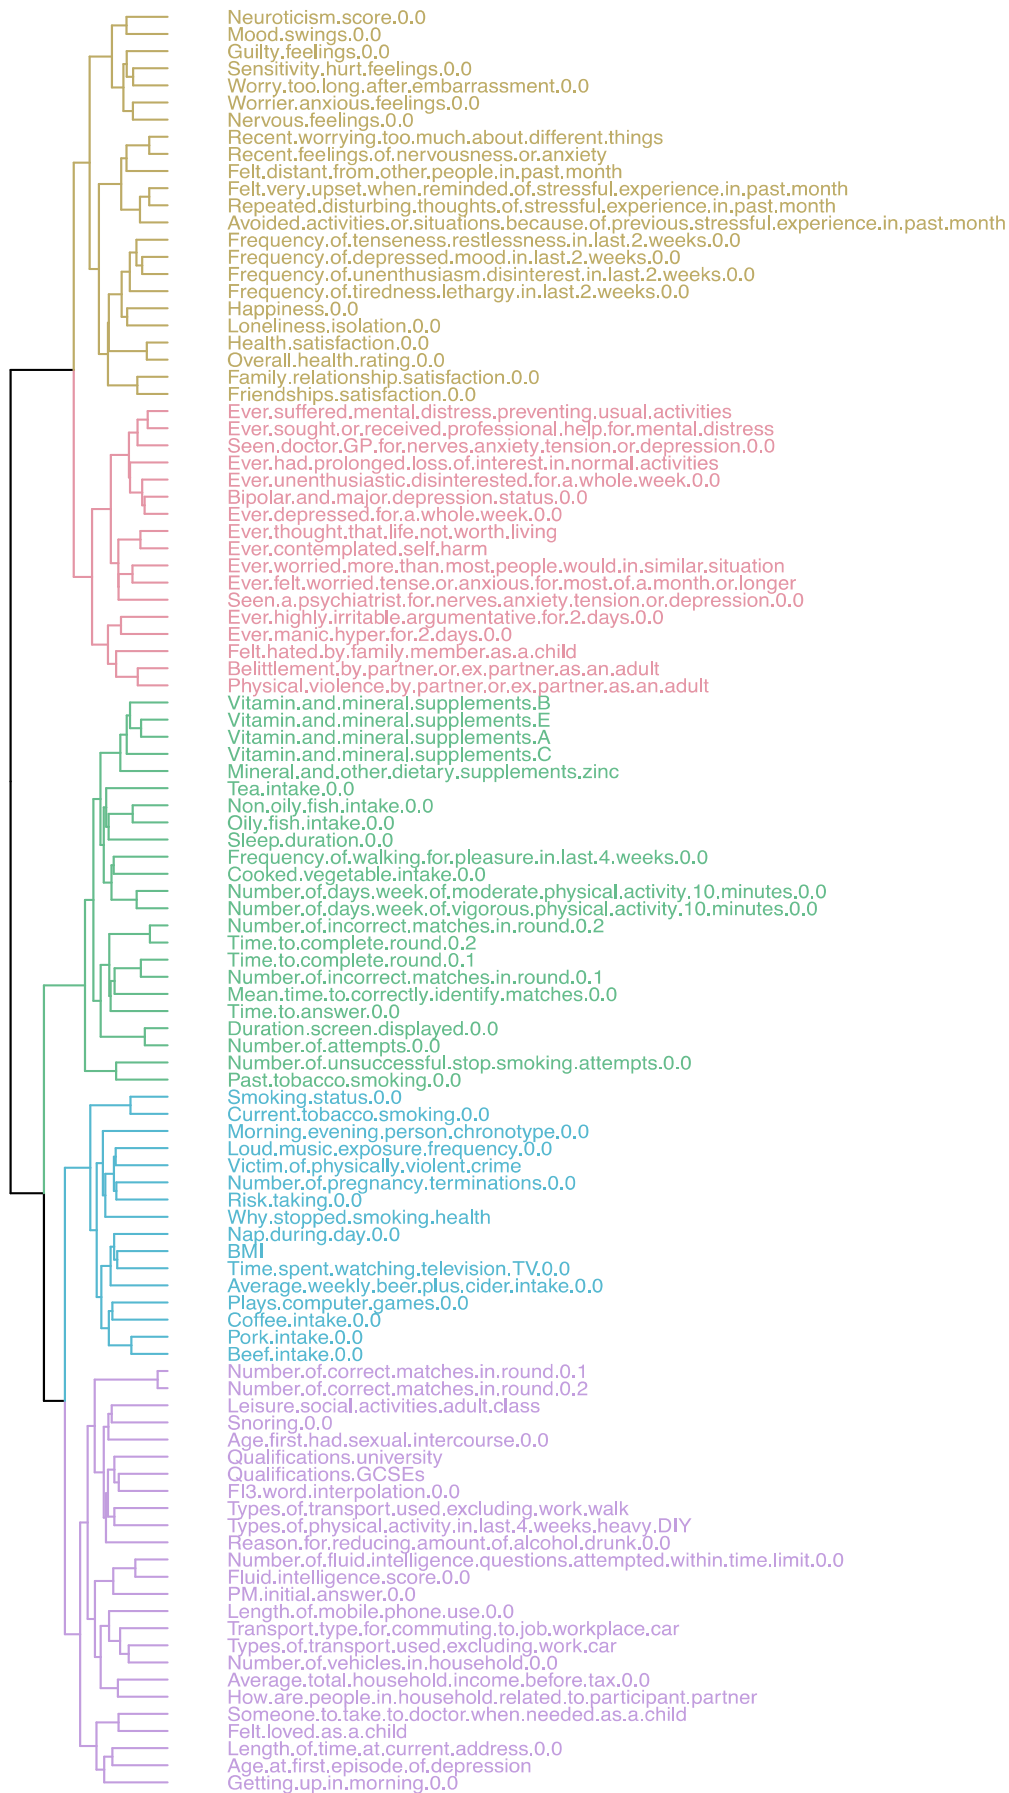

**Supplementary Figure 2.** Dendrogram showing phenotypic clustering based on the correlation matrix in Supplementary Fig. 2 for the 104 target traits associated with schizophrenia PRS at  $P < 1 \times 10^{-7}$

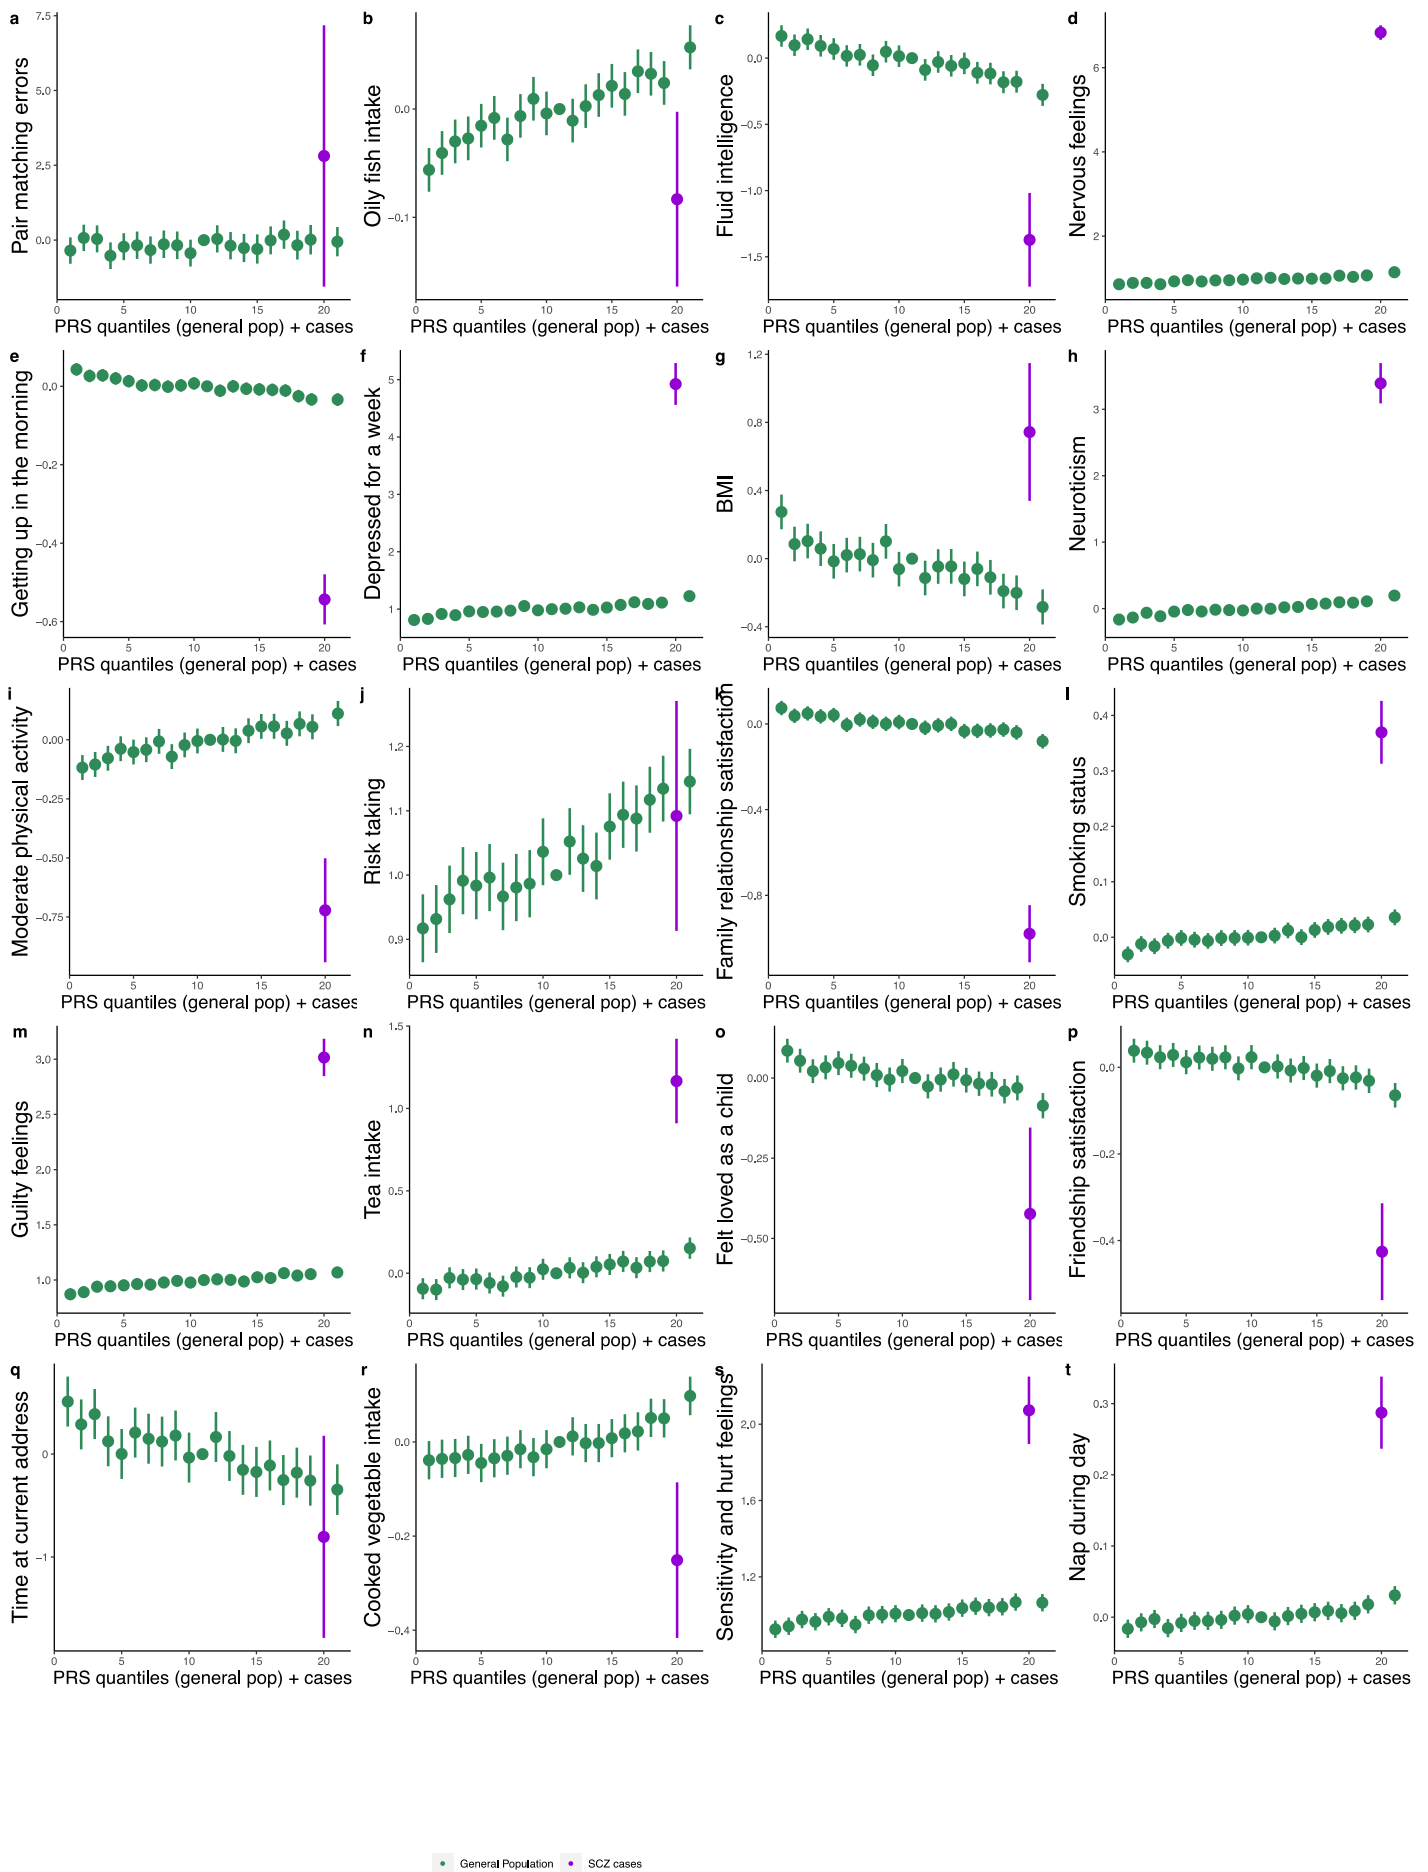

**Supplementary Figure 3.** PRS-by-trait quantile plots (in green) indicating the trends of association between the best-fit schizophrenia PRS and the target behavioural traits among 20 of the most significant associations, matching those of Fig. 1. The quantile plot is ordered from low to high genetic risk for schizophrenia, according to PRS in the target (UK Biobank) data, with each green point representing the average target trait value of a 5% quantile of the sample. Schizophrenia cases (purple) show the average PRS quantile of cases compared to the quantiles of the general population.

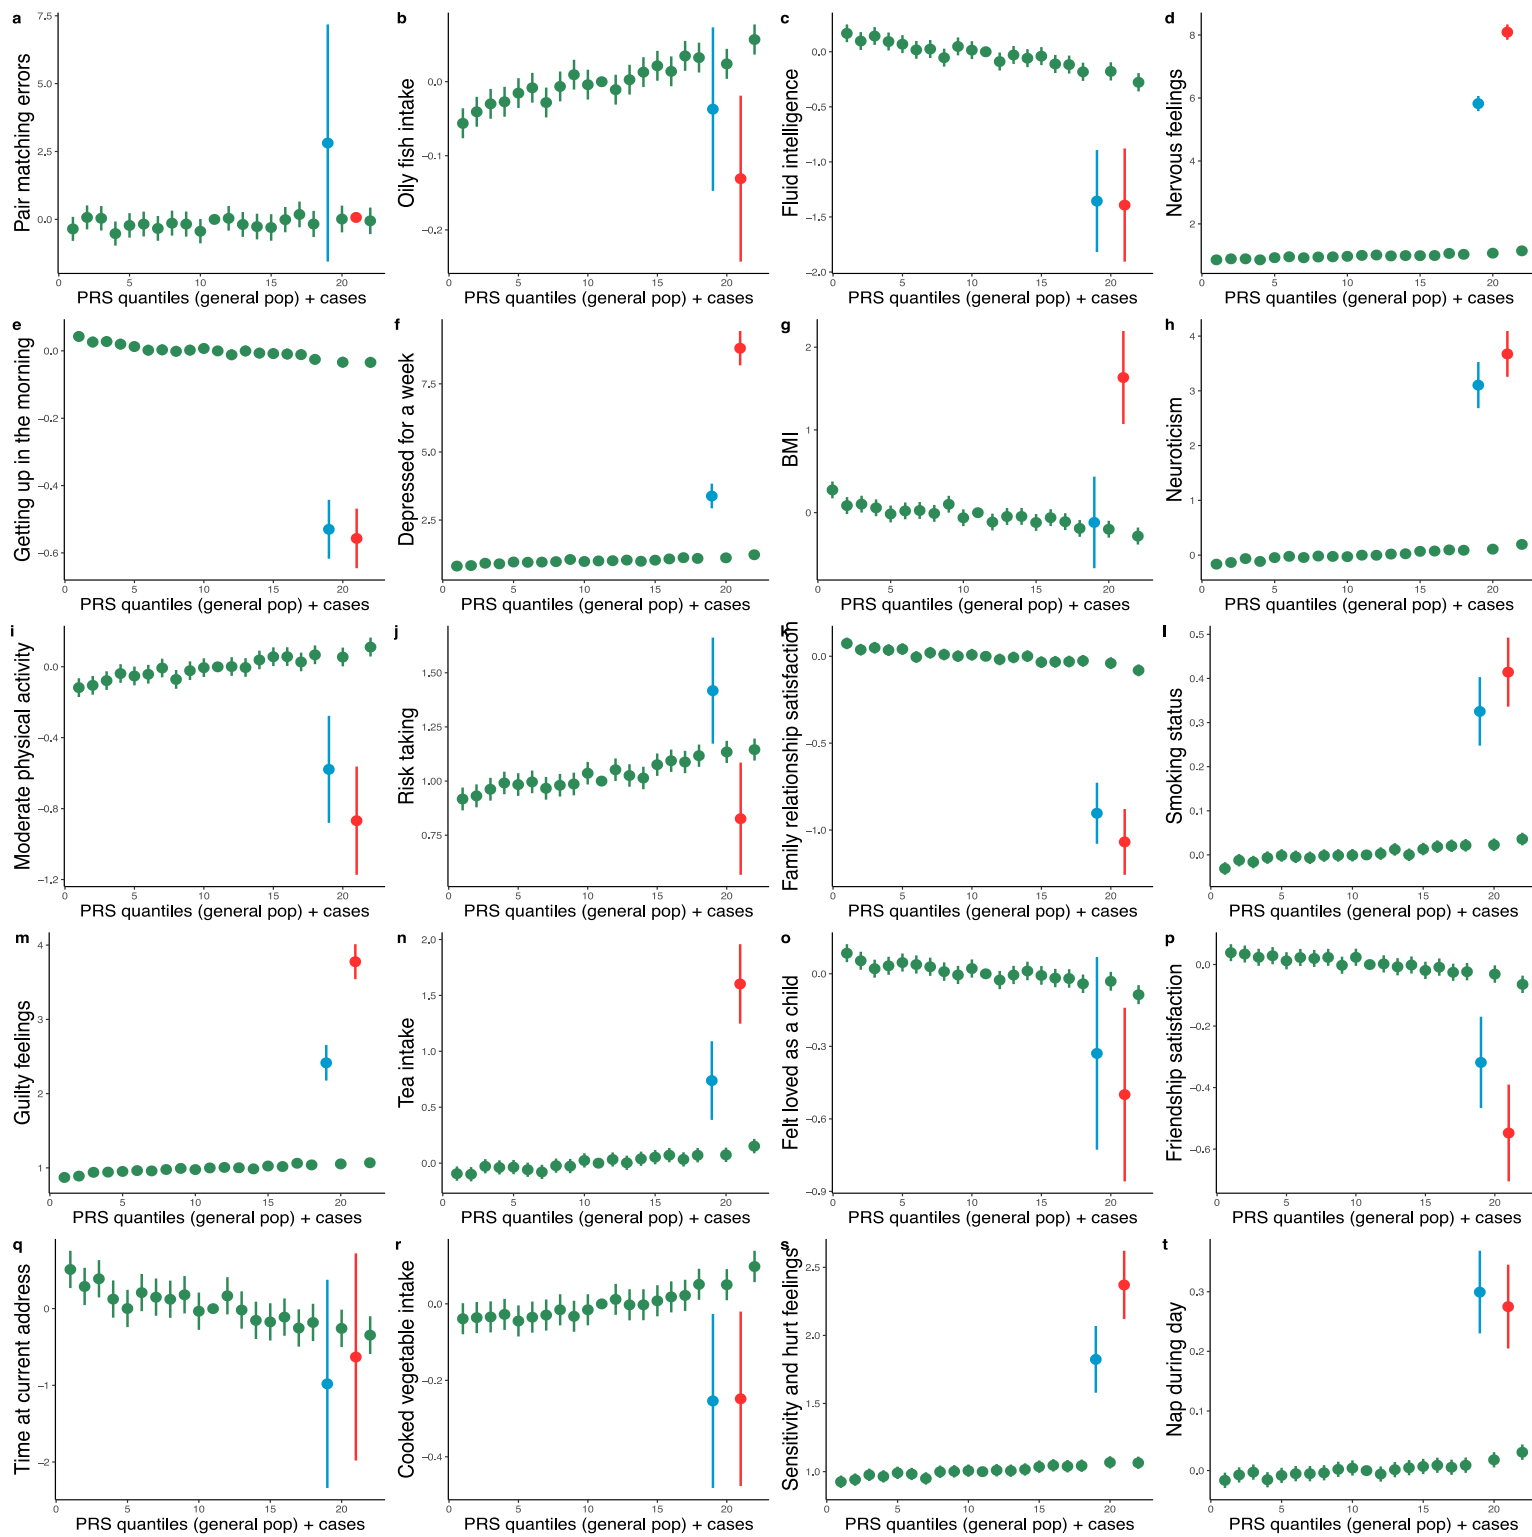

### Supplementary

- General Population (screened)
- SCZ cases, non-medicated
- SCZ cases, medicated

**Figure 4.** PRS-by-trait quantile plots (in green) indicating the trends of association between the best-fit schizophrenia PRS and the target behavioural traits among 20 of the most significant associations, matching those of **Fig. 1**. The quantile plot is ordered from low to high genetic risk for schizophrenia, according to PRS in the target (UK Biobank) data, with each green point representing the average target trait value of a 5% quantile of the sample. Medicated (red) and non-medicated (blue) schizophrenia cases show the average PRS quantile of medicated and non-medicated cases compared to the quantiles of the general population.

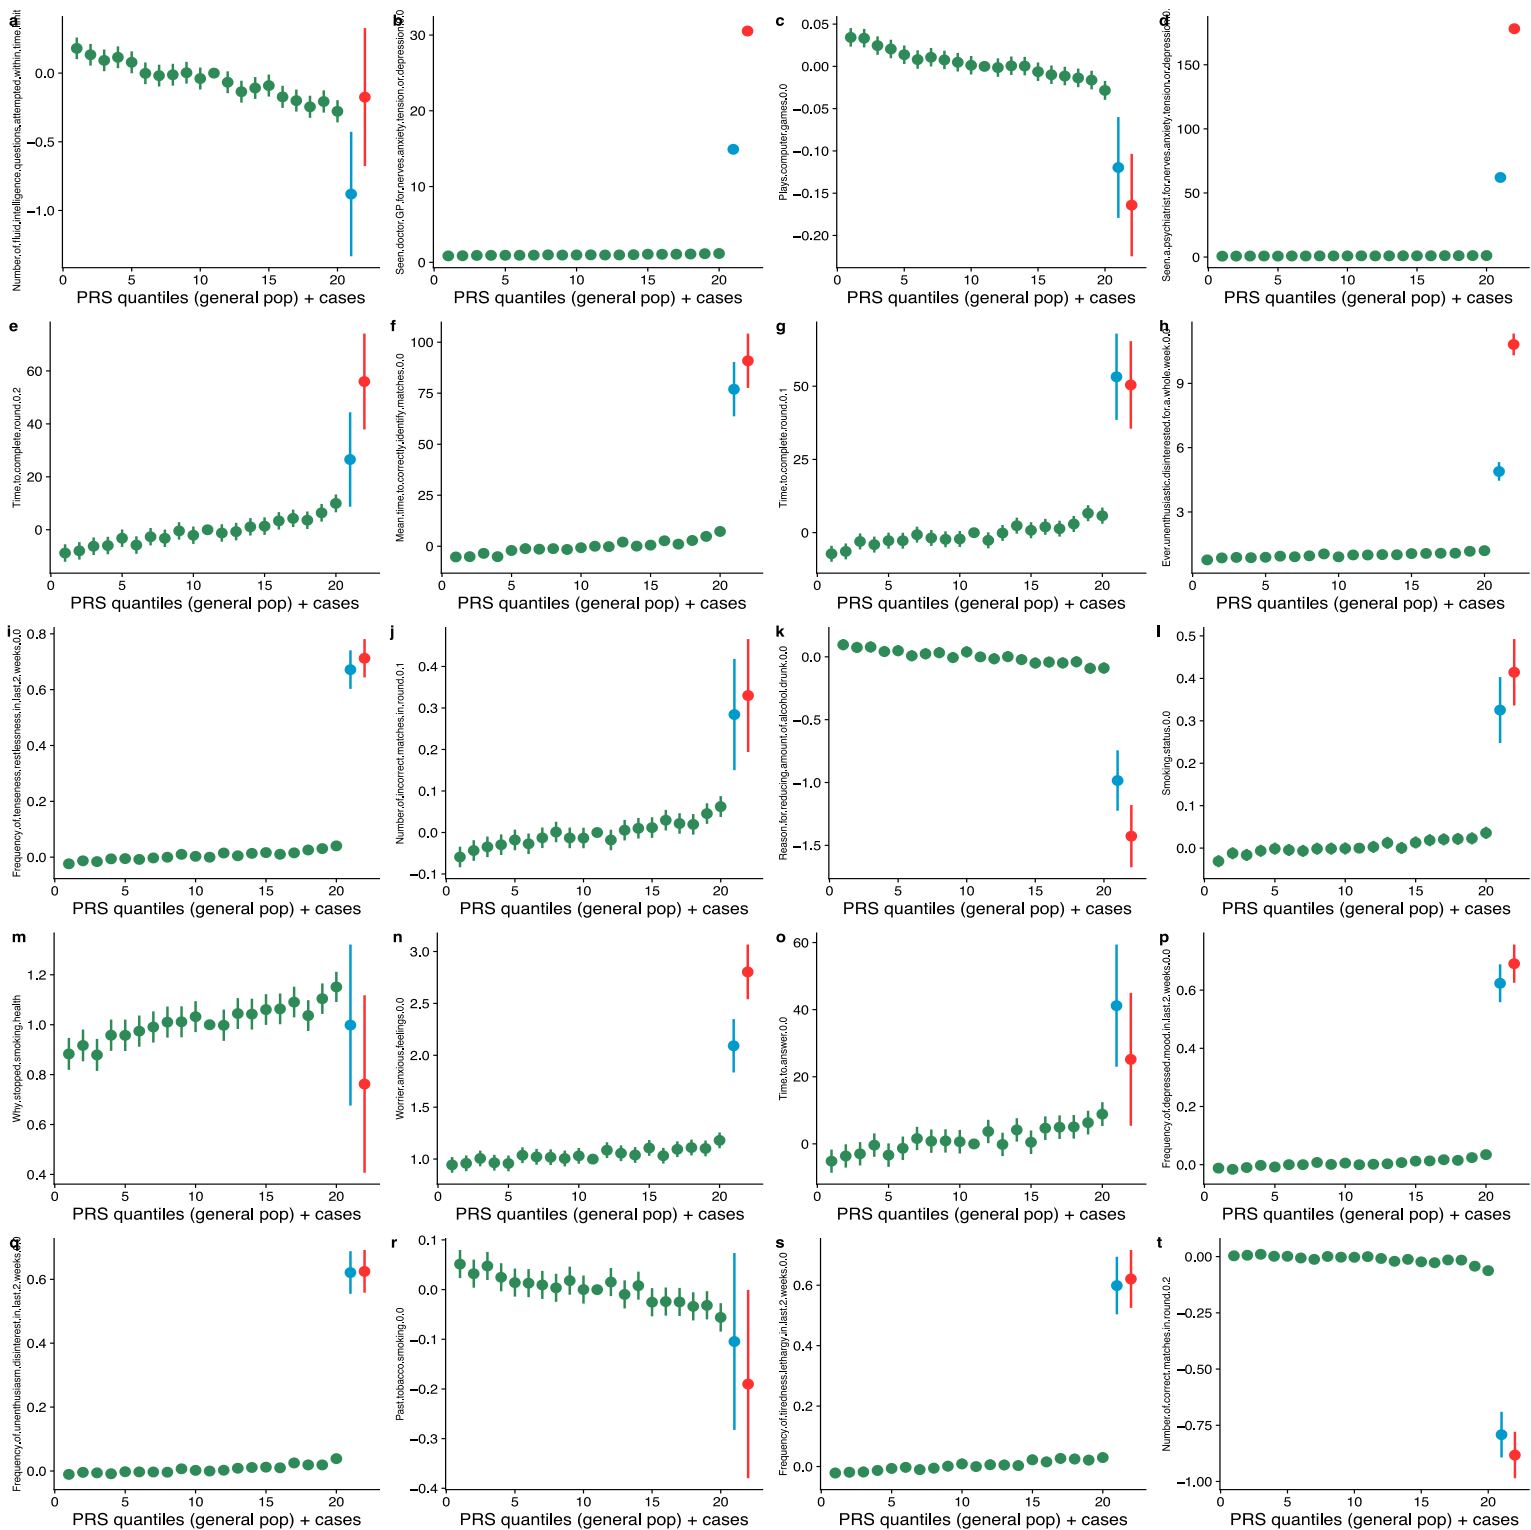

● General Population (screened)  
 ● SCZ cases, non-medicated  
 ● SCZ cases, medicated

**Supplementary Figure 5.** PRS-by-trait quantile plots (in green) indicating the trends of association between the best-fit schizophrenia PRS and the target behavioural traits among all significant associations ( $P < 1 \times 10^{-7}$ ), ordered by significance, excluding those of Fig. 1 (see Supplementary Table 2 for details). Each quantile plot is ordered from low to high genetic risk for schizophrenia, according to PRS in the target (UK Biobank) data, with each green point representing the average target trait value of a 5% quantile of the sample. Non-medicated (blue) and medicated (red), at baseline, diagnosed individuals are appended to the right end of each plot, reflecting the expected higher genetic burden of diagnosed individuals compared to unaffected individuals (see Main Text). Vertical lines represent 95% confidence intervals; these appear absent for some traits with a large range and are larger in the two categories of cases due to their smaller sample sizes.

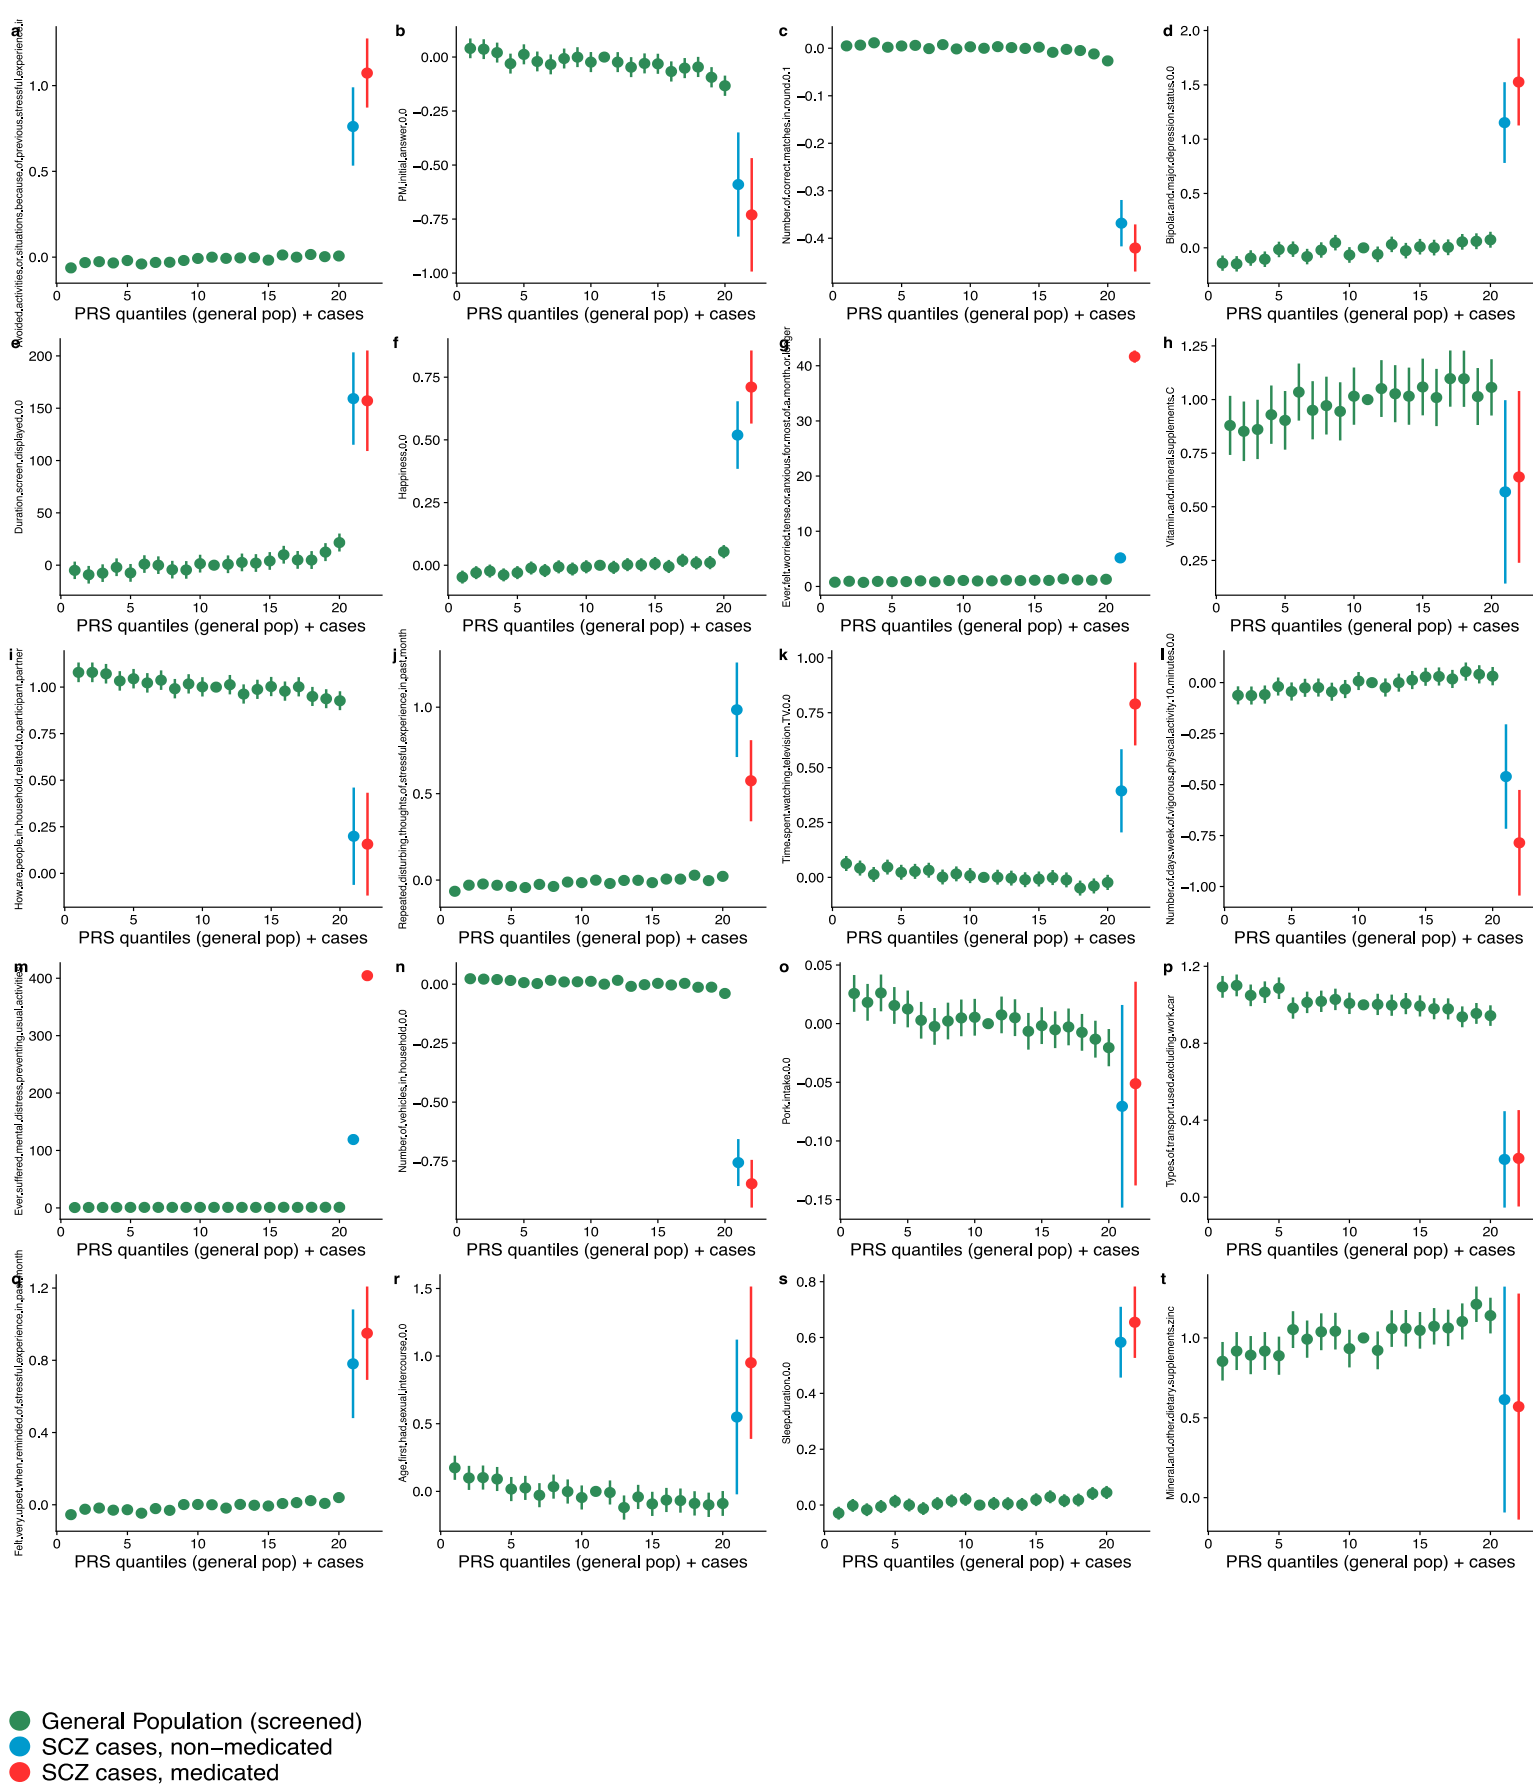

**Supplementary Figure 6.** PRS-by-trait quantile plots (in green) indicating the trends of association between the best-fit schizophrenia PRS and the target behavioural traits among all significant associations ( $P < 1 \times 10^{-7}$ ), ordered by significance, excluding those of Fig. 1 (see Supplementary Table 2 for details). Each quantile plot is ordered from low to high genetic risk for schizophrenia, according to PRS in the target (UK Biobank) data, with each green point representing the average target trait value of a 5% quantile of the sample. Non-medicated (blue) and medicated (red), at baseline, diagnosed individuals are appended to the right end of each plot, reflecting the expected higher genetic burden of diagnosed individuals compared to unaffected individuals (see Main Text). Vertical lines represent 95% confidence intervals; these appear absent for some traits with a large range and are larger in the two categories of cases due to their smaller sample sizes.

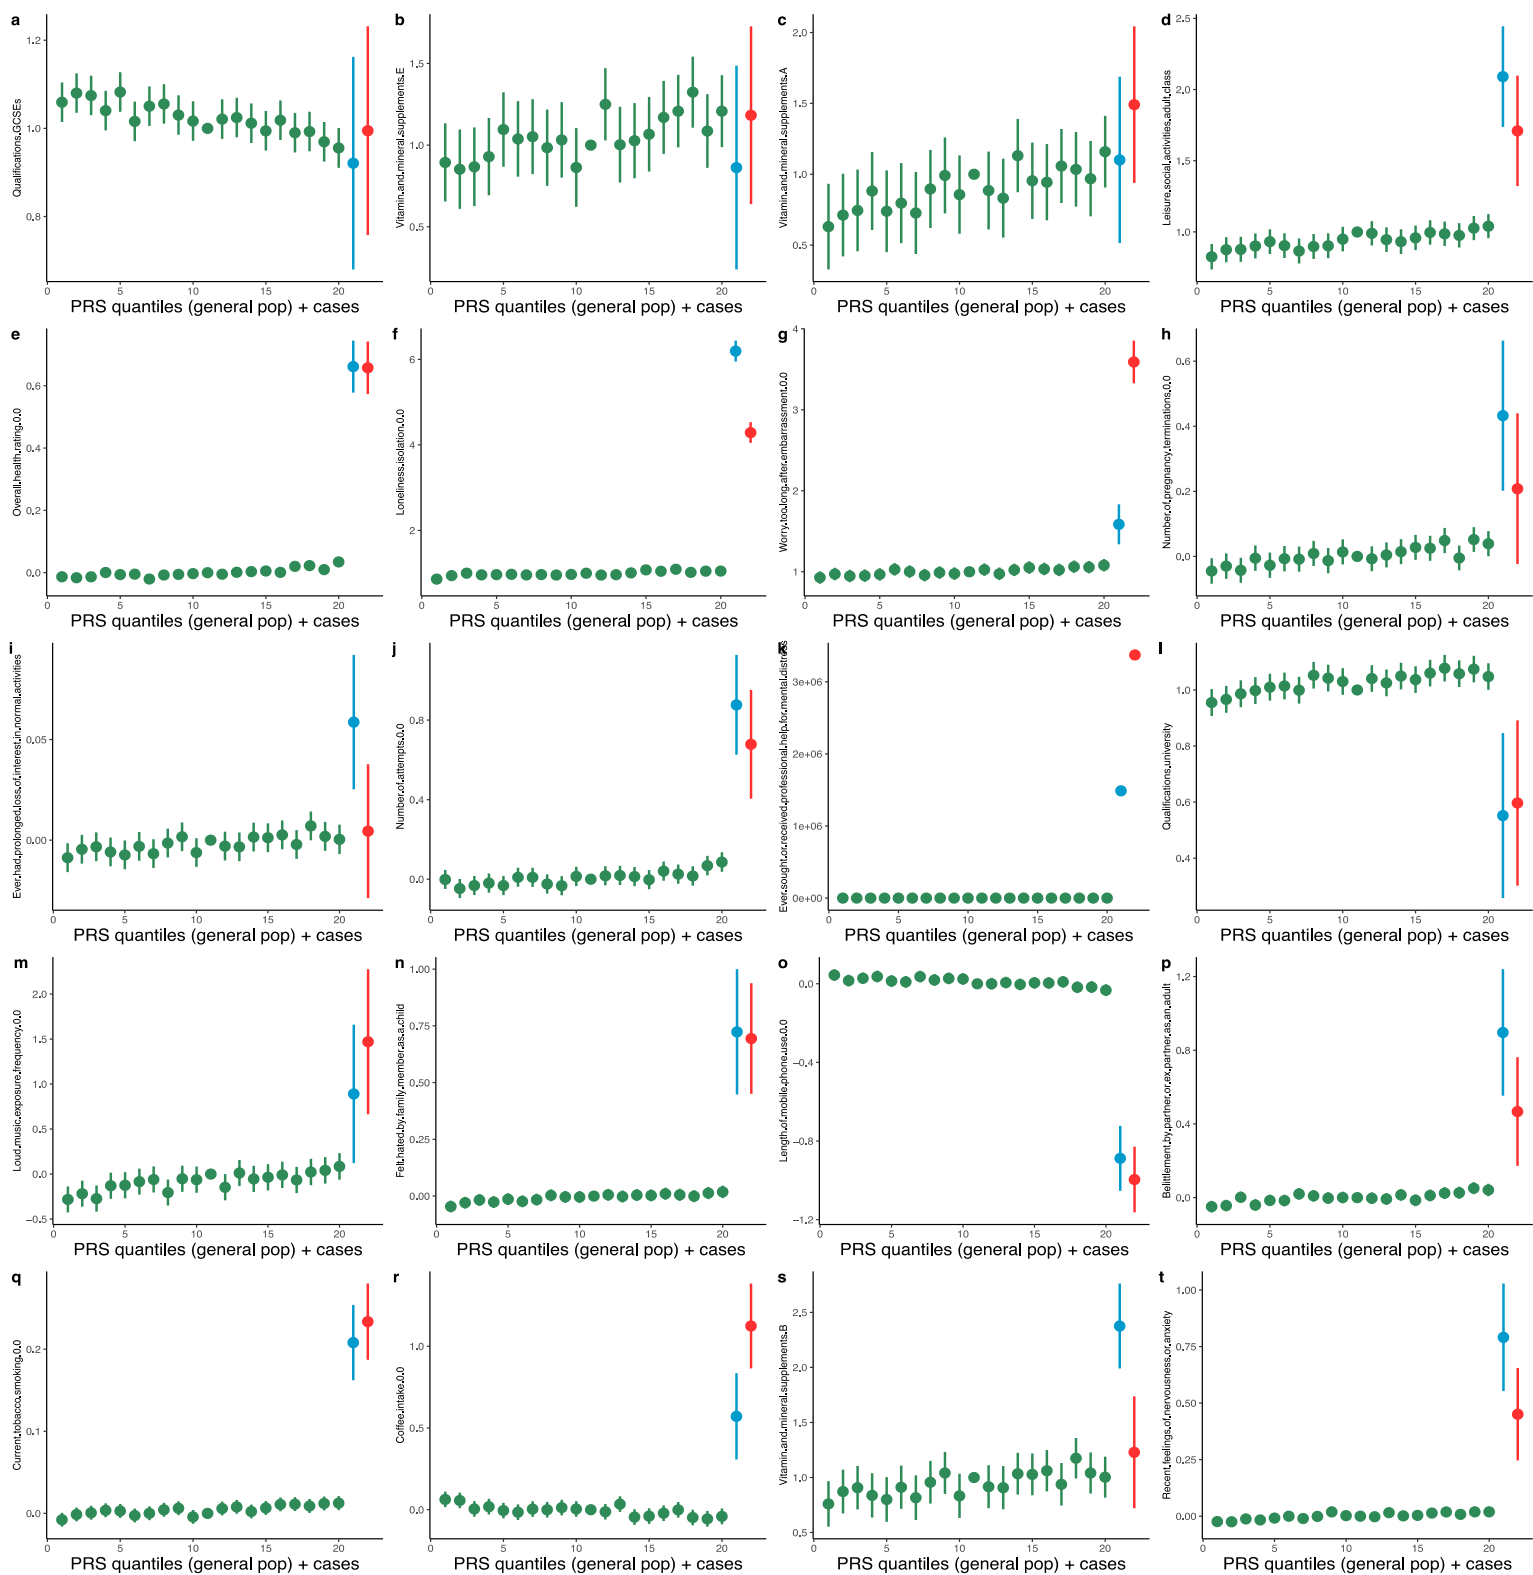

● General Population (screened)  
● SCZ cases, non-medicated  
● SCZ cases, medicated

**Supplementary Figure 7.** PRS-by-trait quantile plots (in green) indicating the trends of association between the best-fit schizophrenia PRS and the target behavioural traits among all significant associations ( $P < 1 \times 10^{-7}$ ), ordered by significance, excluding those of Fig. 1 (see Supplementary Table 2 for details). Each quantile plot is ordered from low to high genetic risk for schizophrenia, according to PRS in the target (UK Biobank) data, with each green point representing the average target trait value of a 5% quantile of the sample. Non-medicated (blue) and medicated (red), at baseline, diagnosed individuals are appended to the right end of each plot, reflecting the expected higher genetic burden of diagnosed individuals compared to unaffected individuals (see Main Text). Vertical lines represent 95% confidence intervals; these appear absent for some traits with a large range and are larger in the two categories of cases due to their smaller sample sizes.

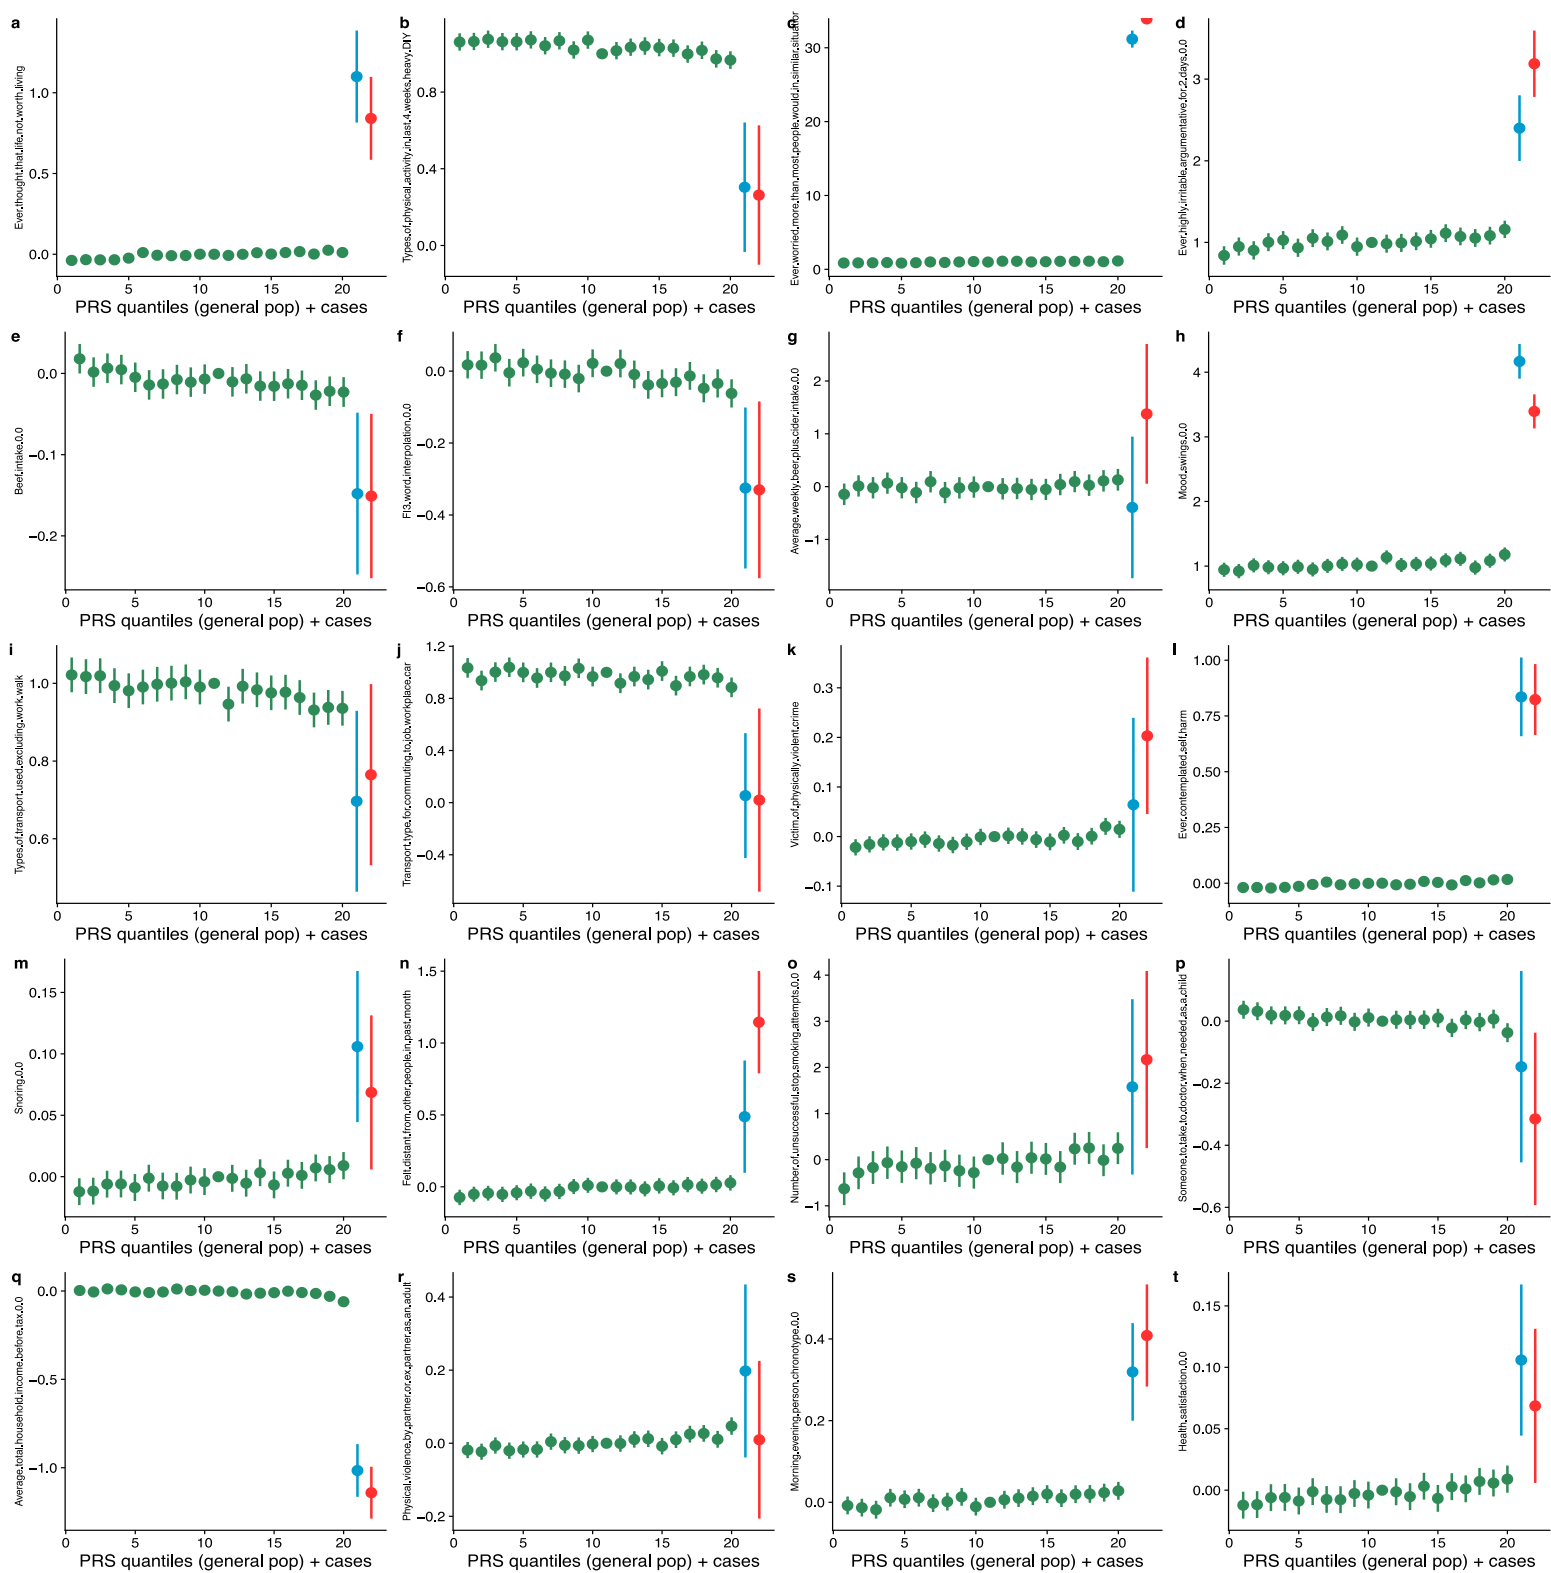

**Supplementary Figure 8.** PRS-by-trait quantile plots (in green) indicating the trends of association between the best-fit schizophrenia PRS and the target behavioural traits among all significant associations ( $P < 1 \times 10^{-7}$ ), ordered by significance, excluding those of Fig. 1 (see Supplementary Table 2 for details). Each quantile plot is ordered from low to high genetic risk for schizophrenia, according to PRS in the target (UK Biobank) data, with each green point representing the average target trait value of a 5% quantile of the sample. Non-medicated (blue) and medicated (red), at baseline, diagnosed individuals are appended to the right end of each plot, reflecting the expected higher genetic burden of diagnosed individuals compared to unaffected individuals (see Main Text). Vertical lines represent 95% confidence intervals; these appear absent for some traits with a large range and are larger in the two categories of cases due to their smaller sample sizes.

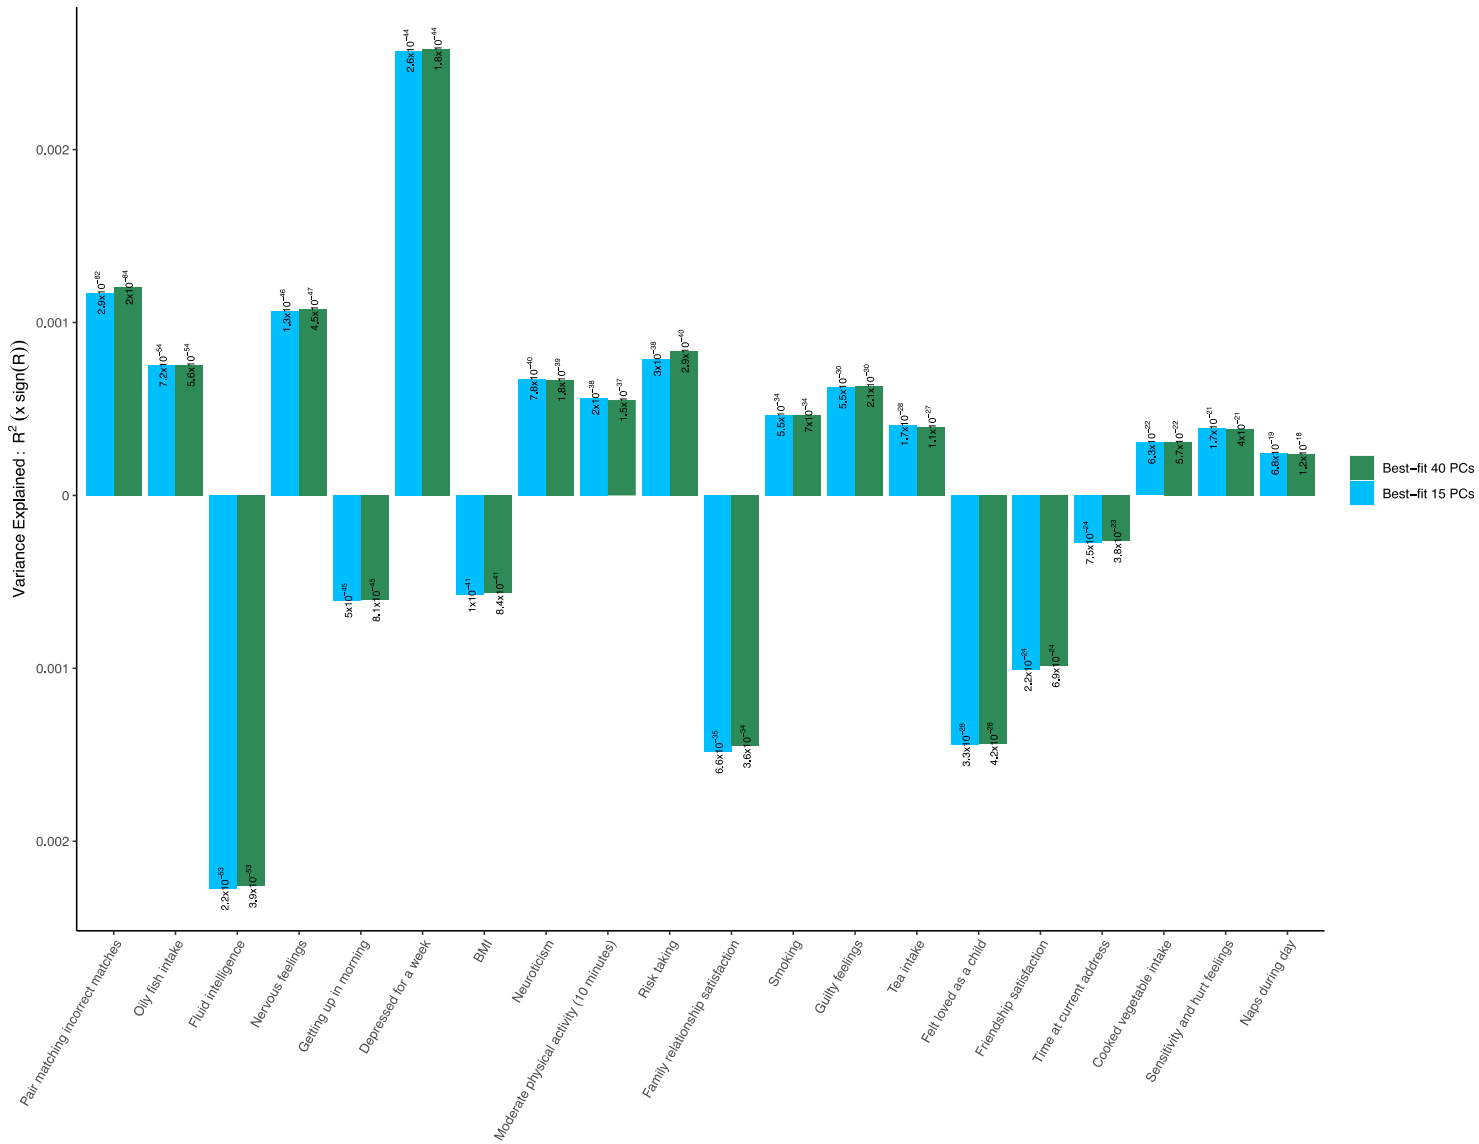

**Supplementary Figure 9.** A comparison between the results corresponding to Fig. 1 adjusting for 15 principal components (PCs), in green, and adjusting for 40 PCs, in blue.



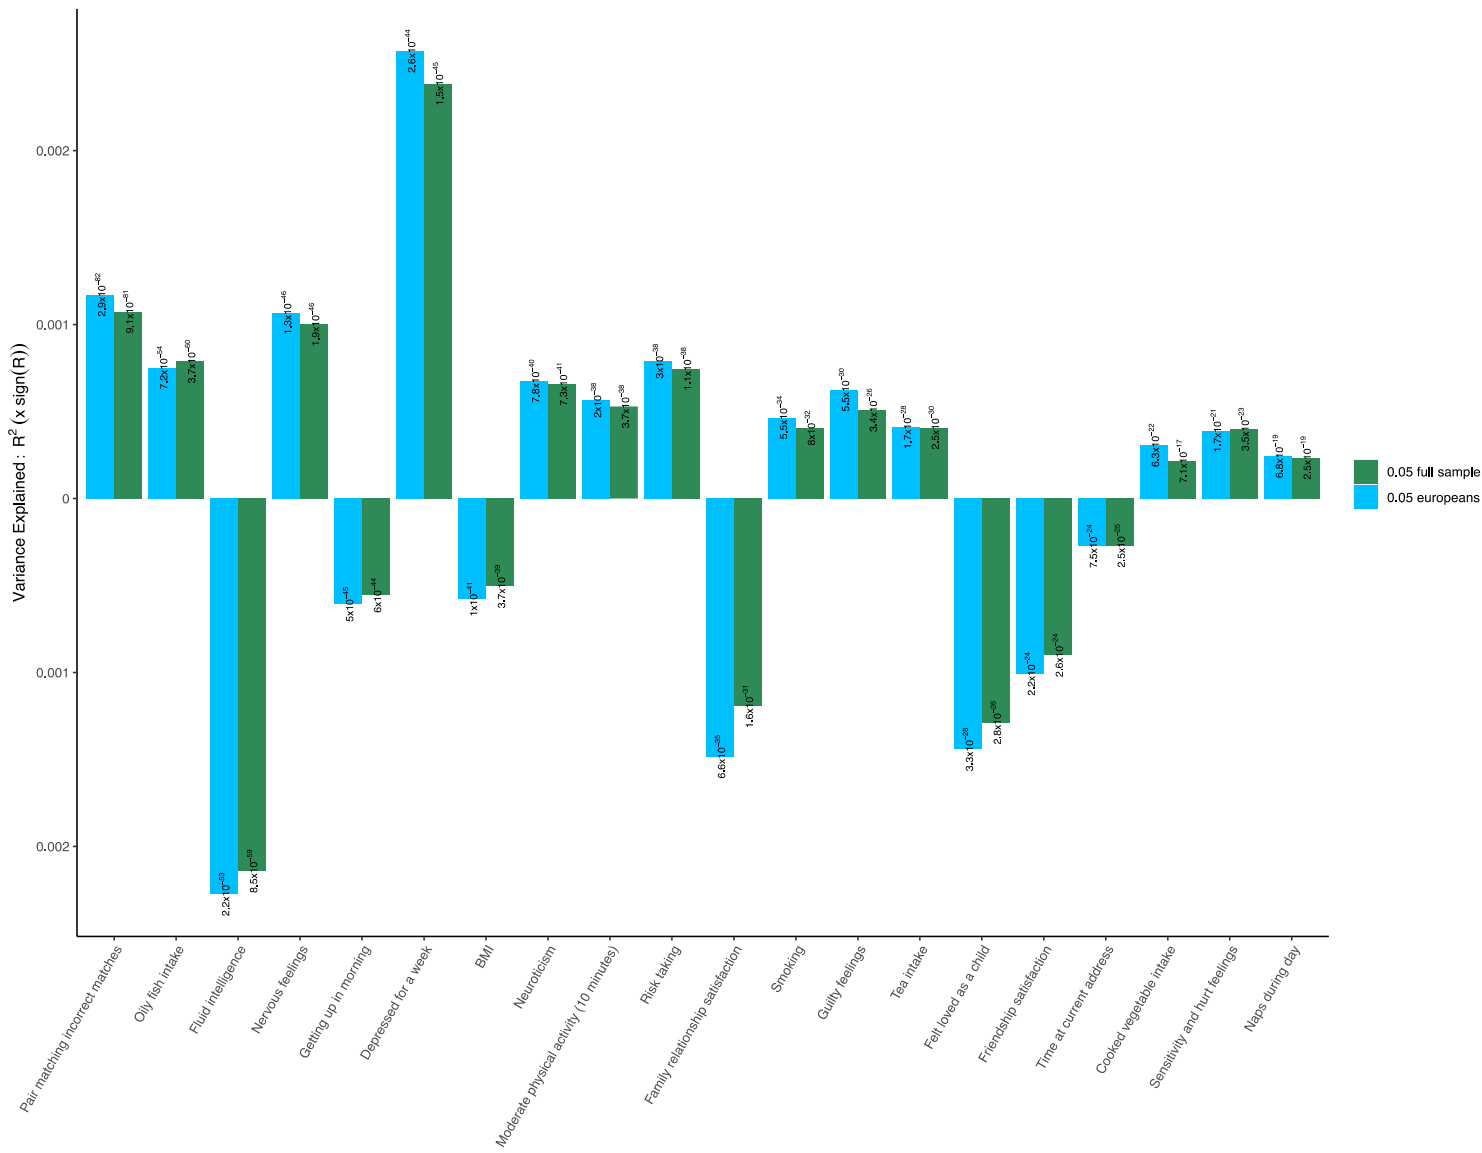

**Supplementary Figure 10.** A comparison between the results corresponding to Fig. 1 showing the Europeans only sample, in green, and the full transethnic sample, in blue.
